# Supplementary material for: Dramatic emission enhancement of aggregation-induced emission luminogens by dynamic metal coordination bonds and the anti-heavy-atom effect
Source: Royal Society of Chemistry journal article supplement (doi:10.1039/d2cc03809a), 2022-01-01
Supplement: d2cc03809a1.pdf [file d2cc03809a1.pdf]

**Electronic Supplementary Information *for***

**Dramatic Emission Enhancement of Aggregation-Induced  
Emission Luminogens by Dynamic Metal Coordination Bonds  
and Anti-Heavy-Atom Effect**

Xuting Cai, Zuping Xiong, Jiale Zhan, Xinni Ping, Yuqing Zhu, Jiaqi Zuo, Hui Feng Zhaosheng

Qian\*

\*Corresponding author. E-mail: qianzhaosheng@zjnu.cn.

Key Laboratory of the Ministry of Education for Advanced Catalysis Materials, College of Chemistry  
and Life Sciences, Zhejiang Normal University, Jinhua 321004, People's Republic of China.

1. **Experimental Section.**
2. **Computational Methods.**
3. **Supplementary Schemes and Figure**
  - 3.1. **Scheme S1.** Synthesis routes of DPDPE and Zn-DPDPE, Cd-DPDPE and Hg-DPDPE.
  - 3.2. **Figure S1.** Time-resolved PL decay curve of DPDPE in solid at room temperature.
  - 3.3. **Figure S2.** The change of UV-visible spectra of DPDPE (100  $\mu\text{M}$ ) in methanol in the presence of different amounts of  $\text{Zn}^{2+}$  (a),  $\text{Cd}^{2+}$  (b), and  $\text{Hg}^{2+}$  (c) respectively, and change of PL spectra of DPDPE (100  $\mu\text{M}$ ) in methanol in the presence of different amounts of  $\text{Zn}^{2+}$  (d),  $\text{Cd}^{2+}$  (e), and  $\text{Hg}^{2+}$  (f) respectively.
  - 3.4. **Figure S3.** The asymmetric units of Zn-DPDPE, Cd-DPDPE and Hg-DPDPE.
  - 3.5. **Figure S4.** Stacking patterns of Zn-DPDPE (a), Cd-DPDPE (b) and Hg-DPDPE (c) in crystal.
  - 3.6. **Figure S5.** Time-resolved PL decay curves of Zn-DPDPE (a), Cd-DPDPE (b) and Hg-DPDPE (c) in solid at room temperature.
  - 3.7. **Figure S6.** Natural transition orbitals of DPDPE for the transition from  $S_0$  to  $S_1$  with labeled contribution calculated with TDDFT.
  - 3.8. **Figure S7.** Natural transition orbitals of Zn-DPDPE for the transition from  $S_0$  to  $S_1$  with labeled contribution calculated with TDDFT.
  - 3.9. **Figure S8.** Natural transition orbitals of Cd-DPDPE for the transition from  $S_0$  to  $S_1$  with labeled contribution calculated with TDDFT.
  - 3.10. **Figure S9.** Natural transition orbitals of Hg-DPDPE for the transition from  $S_0$  to  $S_1$  with labeled contribution calculated with TDDFT.
  - 3.11. **Figure S10.** Controllable patterning demonstrations based on stimuli-responsive behaviours of DPDPE and its zinc complex. (a) A green pattern of mountain is written on a paper containing DPDPE with blue emission using zinc ion, and then is erased using EDTA. (b) The blue paper is firstly turned to green using zinc ion, then a yellow pattern of two leaves is drawn on the green paper using trifluoroacetic acid (TFA), and finally erased with triethenylamine (TEA). (c) The blue paper is firstly turned to green using zinc ion, and then a group of letters “ZJNU” is written on the green paper with quenched fluorescence using sodium sulfide.
  - 3.12. **Figure S11.** (a) PL spectra of DPDPE on a paper in the presence of different compositions: DPDPE,  $\text{DPDPE}+\text{Zn}^{2+}$ , and  $\text{DPDPE}+\text{Zn}^{2+}+\text{EDTA}$ . (b) PL spectra of DPDPE on a paper in the presence of different compositions: DPDPE,  $\text{DPDPE}+\text{Zn}^{2+}$ ,  $\text{DPDPE}+\text{Zn}^{2+}+\text{TFA}$ , and  $\text{DPDPE}+\text{Zn}^{2+}+\text{TFA}+\text{TEA}$ . (c) PL spectra of DPDPE on a

paper in the presence of different compositions: DPDPE, DPDPE+Zn<sup>2+</sup>, and DPDPE+Zn<sup>2+</sup>+Na<sub>2</sub>S.

#### 4. Supplementary Tables

**4.1. Table S1.** Crystallographic data for Zn-DPDPE, Cd-DPDPE, Hg-DPDPE.

**4.2. Table S2.** Photophysical properties of DPDPE, Zn-DPDPE, Cd-DPDPE and Hg-DPDPE in different states.

**4.3. Table S3.** Compositions of Natural Transition Orbitals of DPDPE, Zn-DPDPE, Cd-DPDPE and Hg-DPDPE for the S<sub>0</sub>→S<sub>1</sub> transition.

**4.4. Table S4.** Contribution ratios of different groups to natural transition orbitals of DPDPE, Zn-DPDPE, Cd-DPDPE and Hg-DPDPE.

**4.5. Table S5.** Experimental and calculated absorption and emission maxima of DPDPE, Zn-DPDPE, Cd-DPDPE and Hg-DPDPE in different states.

#### 5. NMR and MS Spectra of Compounds

**5.1. Figure S9.** <sup>1</sup>H NMR spectrum of DBDBE in CDCl<sub>3</sub>.

**5.2. Figure S10.** <sup>13</sup>C NMR spectrum of DBDBE in CDCl<sub>3</sub>.

**5.3. Figure S11.** <sup>1</sup>H NMR spectrum of DBDPE in CDCl<sub>3</sub>/CD<sub>3</sub>OD (3:2).

**5.4. Figure S12.** <sup>13</sup>C NMR spectrum of DBDPE in CDCl<sub>3</sub>/CD<sub>3</sub>OD (3:2).

**5.5. Figure S13.** <sup>1</sup>H NMR spectrum of Zn-DBDPE in CDCl<sub>3</sub>/CD<sub>3</sub>OD (3:2).

**5.6. Figure S14.** <sup>13</sup>C NMR spectrum of Zn-DBDPE in CDCl<sub>3</sub>/CD<sub>3</sub>OD (3:2).

**5.7. Figure S15.** <sup>1</sup>H NMR spectrum of Cd-DBDPE in CDCl<sub>3</sub>/CD<sub>3</sub>OD (3:2).

**5.8. Figure S16.** <sup>13</sup>C NMR spectrum of Cd-DBDPE in CDCl<sub>3</sub>/CD<sub>3</sub>OD (3:2).

**5.9. Figure S17.** <sup>1</sup>H NMR spectrum of Hg-DBDPE in CDCl<sub>3</sub>/CD<sub>3</sub>OD (3:2).

**5.10. Figure S18.** <sup>13</sup>C NMR spectrum of Hg-DBDPE in CDCl<sub>3</sub>/CD<sub>3</sub>OD (3:2).

**5.11. Figure S19.** High-resolution mass spectrum of DPDBE.

**5.12. Figure S20.** High-resolution mass spectrum of DPDPE.

#### 6. Cartesian Coordinates

#### 7. References

## 1. Experimental Section

**Synthesis of ((Z)-(1,2-diphenyl)-(Z)-di(4,4,5,5-tetramethyl-1,3,2-dioxaborolan-2-yl))ethene (DPDBE).** To a degassed solution of diphenylacetylene (5.00 g, 28.0 mmol) and bis(pinacolato)diboron (14.25 g, 56.0 mmol) in DMF (150 ml) was added Pt(PPh<sub>3</sub>)<sub>4</sub> (0.35 g, 1 mol%), and then the mixture was heated at 90°C for 24 h. After cooling to room temperature, the reaction mixture was extracted three times with ethyl acetate. The crude product of DPDBE was obtained after removal of the solvent under reduced pressure. DPDBE (10.00 g) was obtained by washing several times with ethanol as a white solid in a yield of 82%. Molecular formula: C<sub>26</sub>H<sub>34</sub>B<sub>2</sub>O<sub>4</sub>. <sup>1</sup>H NMR (400 MHz, CDCl<sub>3</sub>) δ (ppm) 7.07-7.05 (m, 6H), 6.95-6.94 (d, J=4 Hz, 4H), 1.32 (s, 24H). <sup>13</sup>C NMR (150 MHz, CDCl<sub>3</sub>) δ (ppm) 141.27, 129.32, 127.44, 125.80, 84.08, 24.90. HRMS (EI) m/z: [M+H]<sup>+</sup> 433.2735 (calcd. 433.2643).

**Synthesis of ((Z)-(1,2-diphenyl)-(Z)-1,2-dipyridin-4-yl)ethene (DPDPE).** A mixture of DPDBE (2.00 g, 4.6 mmol), 4-bromopyridine (1.10 mL, 11.56 mmol), potassium carbonate (1.60 g, 11.56 mmol) and Pd(PPh<sub>3</sub>)<sub>4</sub> (0.10 g, 0.10 mmol) in 150 mL of toluene/THF/water (8:6:1; v/v/v) was refluxed for 24 h under nitrogen. After cooling to room temperature, the reaction mixture was extracted three times with dichloromethane. The combined organic layers were washed with brine and then dried over MgSO<sub>4</sub>. After removal of the solvent under reduced pressure, the residue was purified by column chromatography on silica gel using ethyl acetate/petroleum ether (2:3) as eluent. The final product DPDPE was obtained by recrystallization with ethanol as a white solid (1.10 g) in 72% yield. Molecular formula: C<sub>24</sub>H<sub>18</sub>N<sub>2</sub>. <sup>1</sup>H NMR (400 MHz, CDCl<sub>3</sub>/CD<sub>3</sub>OD=3:2) δ (ppm) 8.34-8.33 (d, J=8 Hz, 4H), 7.18-7.16 (m, 6H), 7.06-7.05 (d, J=8 Hz, 4H), 7.01-6.99 (d, J=8 Hz, 4H). <sup>13</sup>C NMR (150 MHz, CDCl<sub>3</sub>/CD<sub>3</sub>OD=3:2) δ (ppm) 150.50, 149.74, 141.41, 140.60, 131.02, 128.12, 127.56, 125.69. HRMS (EI) m/z: [M+H]<sup>+</sup> 335.1541 (calcd. 335.1570), [M+Na]<sup>+</sup> 357.1361 (calcd. 357.1470).

**Crystal growth of the complex of Zn<sup>2+</sup> and DPDPE (Zn-DPDPE).** To a solution of DPDPE (1.00 g, 3.00 mmol) in CHCl<sub>3</sub> (10 mL), a methanol solution of Zn(OAc)<sub>2</sub>·2H<sub>2</sub>O (1.37 g, 6.00 mmol) was added and the solution was stirred for 1 h at room temperature. After removal of the solvent under reduced pressure, the final product Zn-DPDPE was obtained as a white solid (0.95 g) in 62% yield.

The solid (20 mg) was dissolved in a mixed solution containing  $\text{CHCl}_3$  (2 mL), methanol (1 mL) and petroleum ether (1 mL) to the saturated state, and then the resulting mixture was naturally evaporated at room temperature through several small pores. The cubic and colorless crystals were obtained, and then were selected for single-crystal X-ray diffraction analysis.  $^1\text{H}$  NMR (400 MHz,  $\text{CDCl}_3/\text{CD}_3\text{OD}=3:2$ )  $\delta$  (ppm) 8.48-8.46 (d,  $J=8$  Hz, 8H), 7.20-7.19 (m, 20H), 7.00-6.99 (d,  $J=8$  Hz, 8H), 2.05 (s, 12H).  $^{13}\text{C}$  NMR (150 MHz,  $\text{CDCl}_3/\text{CD}_3\text{OD}=3:2$ )  $\delta$  (ppm) 180.25, 153.34, 148.99, 141.00, 140.29, 130.82, 128.34, 128.09, 126.95, 21.83. CCDC No: 2170098.

**Crystal growth of the complex of  $\text{Cd}^{2+}$  and DPDPE (Cd-DPDPE).** To a solution of DPDPE (1.00 g, 3.00 mmol) in  $\text{CHCl}_3$  (10 mL), a methanol solution of  $\text{Cd}(\text{OAc})_2 \cdot 2\text{H}_2\text{O}$  (1.60 g, 6.00 mmol) was added, and then the resulting solution was stirred for 1 h at room temperature. After removal of the solvent under reduced pressure, the final product Cd-DPDPE was obtained as a white solid (0.90 g) in 64% yield. The solid (20 mg) was dissolved in a mixed solution containing  $\text{CHCl}_3$  (2 mL), methanol (1 mL) and petroleum ether (1 mL) to the saturated state, and then the resulting mixture was naturally evaporated at room temperature through several small pores. The cubic and colorless crystals were obtained, and then were selected for single-crystal X-ray diffraction analysis.  $^1\text{H}$  NMR (400 MHz,  $\text{CDCl}_3/\text{CD}_3\text{OD}=3:2$ )  $\delta$  (ppm) 8.38-8.37 (d,  $J=4$  Hz, 8H), 7.19-7.17 (m, 12H), 7.12-7.10 (d,  $J=8$  Hz, 8H), 6.99-6.97 (d,  $J=8$  Hz, 8H), 2.04(s, 12H).  $^{13}\text{C}$  NMR (150 MHz,  $\text{CDCl}_3/\text{CD}_3\text{OD}=3:2$ )  $\delta$  (ppm) 180.62, 152.27, 149.05, 140.81, 140.66, 130.81, 128.23, 127.91, 126.50, 21.18. CCDC No: 2170097.

**Crystal growth of the complex of  $\text{Hg}^{2+}$  and DPDPE (Hg-DPDPE).** To a solution of DPDPE (1.00 g, 3.00 mmol) in  $\text{CHCl}_3$  (10 mL), a methanol solution of  $\text{Hg}(\text{OAc})_2 \cdot 2\text{H}_2\text{O}$  (2.12 g, 6.00 mmol) was added, and then the solution was stirred for 1 h at room temperature. After removal of the solvent under reduced pressure, the final product Hg-DPDPE was obtained as a white solid (1.02 g) in 50% yields. The solid (20 mg) was dissolved in a mixed solution containing  $\text{CHCl}_3$  (2 mL), methanol (1 mL) and petroleum ether (1 mL) to the saturated state, and then the resulting mixture was naturally evaporated at room temperature through several small pores. The cubic and colorless crystals were obtained, and then were selected for single-crystal X-ray diffraction analysis.  $^1\text{H}$  NMR (400 MHz,  $\text{CDCl}_3/\text{CD}_3\text{OD}=3:2$ )  $\delta$  (ppm) 8.50-8.49 (d,  $J = 4$  Hz, 8H), 7.27-7.25 (m, 10H), 7.21-7.19 (d,  $J = 8$  Hz,

10H), 6.99-6.97 (d, J=8 Hz, 8H), 2.08(s, 12H). <sup>13</sup>C NMR (150 MHz, CDCl<sub>3</sub>/CD<sub>3</sub>OD=3:2) δ (ppm) 180.62, 152.27, 149.05, 140.81, 140.66, 130.81, 128.23, 127.91, 126.50, 21.18. CCDC No: 2170096.

**Characterization of UV-Visible and Fluorescence Properties of All Samples.** UV-vis absorption spectra were recorded using an Agilent Cary 5000 UV-Vis-NIR spectrophotometer. Steady PL spectra of all samples were performed on an Edinburgh Instruments model FLS980 fluorescence spectrophotometer equipped with a xenon arc lamp using a front face sample holder. Time-resolved fluorescence measurements were conducted with EPL-series lasers. The absolute PL quantum yields of all samples were determined using an integrating sphere equipped in FLS980 spectrophotometer for at least three times.

**Controllable Patterning Application Based on Stimuli-Responsive Behaviours of Dynamic DPDPE-Metal Complexes.** A paper was soaked with a solution of DPDPE at 100 μM, and then the paper was dried naturally. The paper retained white in daylight, but exhibited intense blue emission under UV light. After a pattern of mountain was drawn on the paper using a solution of zinc ion, the pattern with green color appeared while the background is with blue emission under UV light, and the mountain pattern can be easily erased with a solution of EDTA to return its initial state, during which a competitive coordination reaction occurs. After the paper soaked with DPDPE was further treated with a solution of zinc ion, the whole paper turned from blue to bright green color under the UV light. Then a pattern of two leaves was drawn on the paper using trifluoacetic acid, the yellow leaves appeared under the UV light, and then the pattern can be rapidly erased with triethylamine, during which a competition between a coordination reaction and an acid-base reaction takes place. The paper soaked with DPDPE can be treated using sodium sulfide to write a group of letters “ZJNU”, where the letters appeared with quenched fluorescence under the UV light, during which a competition between a coordination reaction and a precipitation reaction takes place and the formed precipitate ZnS can quench the fluorescence of DPDPE. The PL spectra during these controllable patterning demonstrations were recorded and displayed in Figure S11, which well supported the observed changes in emission colors. Therefore, controllable patterning can be achieved based on the distinct emission colors of DPDPE and its zinc complex on the paper by competitive reactions and dynamic

nature of these complexes.

## **2. Computational Details.**

All the calculations were performed with density functional theory (DFT) and time-dependent density functional theory (TDDFT) implemented in Gaussian 09 program package.<sup>1</sup> The equilibrium geometries at  $S_0$  and  $S_1$  state and the normal modes of vibration of the single molecule of DPDPE, Zn-DPDPE, Cd-DPDPE and Hg-DPDPE were computed using density functional theory (DFT) with the hybrid M062X functional at 6-31+G(d,p) level.<sup>2</sup> Excitation energies, absorption maxima and emission maxima of all the four molecules were calculated using M062X functional with 6-31+G(d,p) level based on the optimized structure in acetonitrile with SCRF at  $S_0$  and  $S_1$  state.<sup>3</sup>

### 3. Supplementary Schemes and Figure

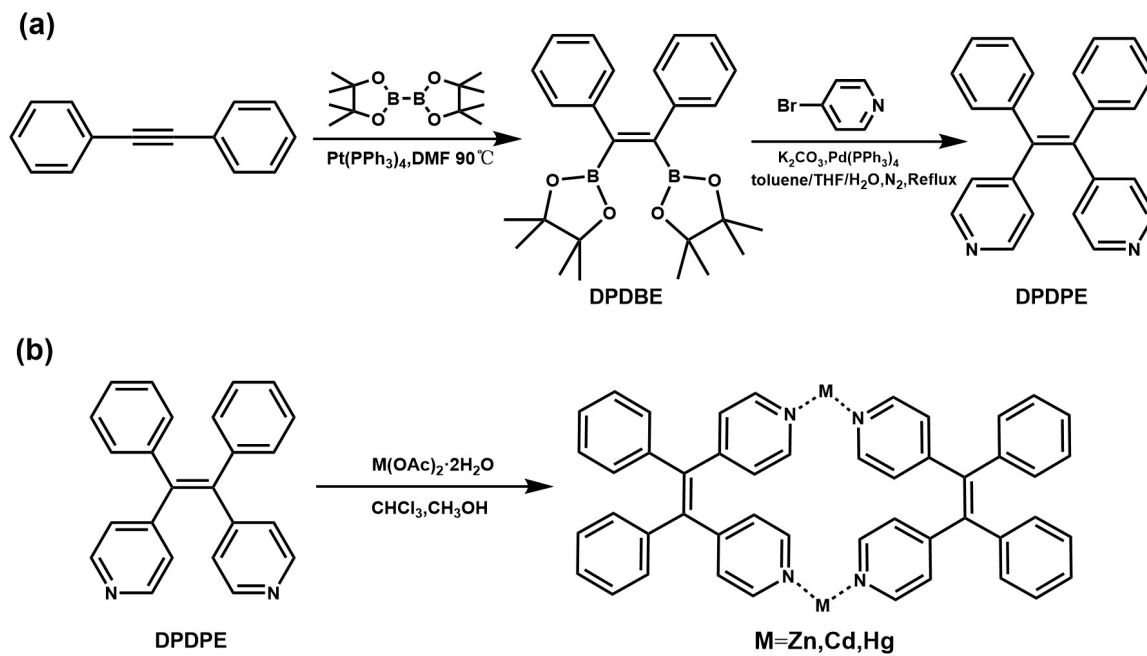

**Scheme S1.** Synthesis routes of DPDPE and Zn-DPDPE, Cd-DPDPE and Hg-DPDPE.



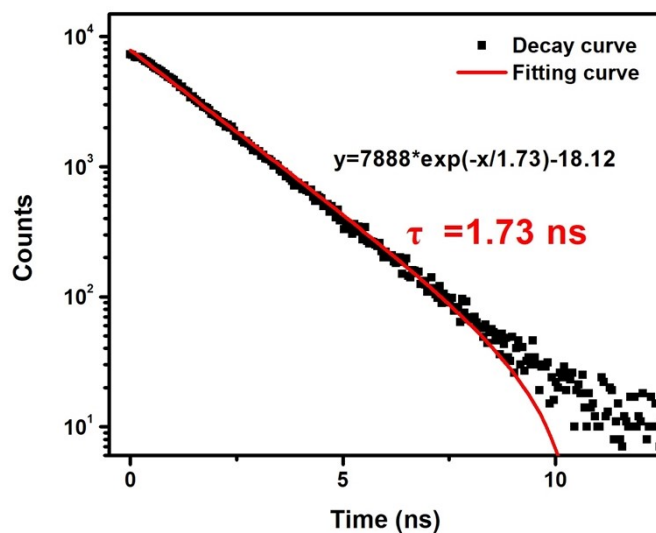

**Figure S1.** Time-resolved PL decay curve of DPDPE in solid at room temperature.

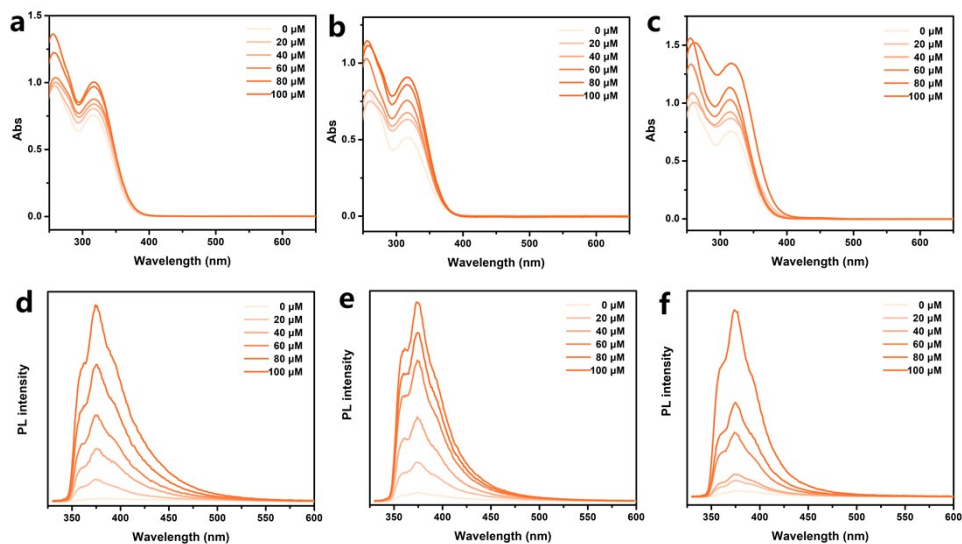

**Figure S2.** The change of UV-visible spectra of DPDPE (100  $\mu\text{M}$ ) in methanol in the presence of different amounts of  $\text{Zn}^{2+}$  (a),  $\text{Cd}^{2+}$  (b), and  $\text{Hg}^{2+}$  (c) respectively, and change of PL spectra of DPDPE (100  $\mu\text{M}$ ) in methanol in the presence of different amounts of  $\text{Zn}^{2+}$  (d),  $\text{Cd}^{2+}$  (e), and  $\text{Hg}^{2+}$  (f) respectively.

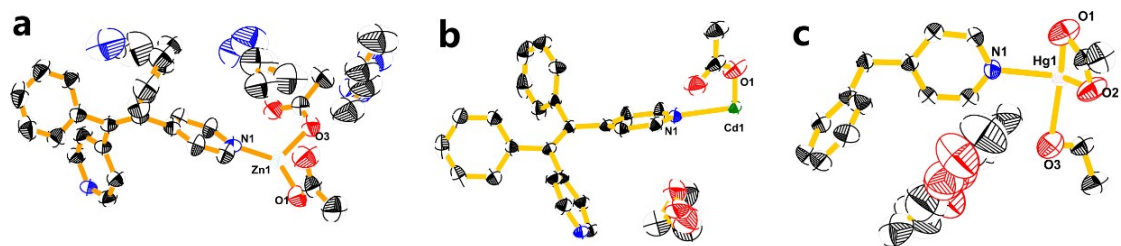

**Figure S3.** The asymmetric units of Zn-DPDPE (a), Cd-DPDPE (b) and Hg-DPDPE (c).

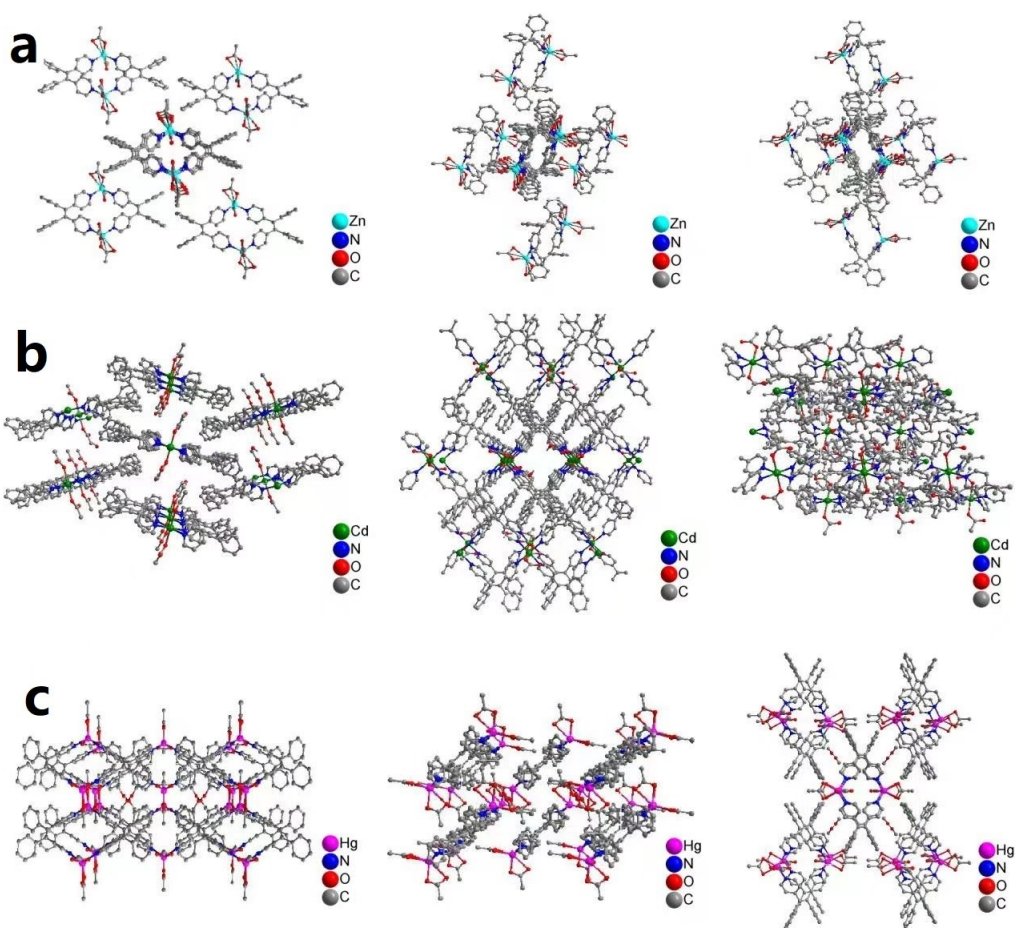

**Figure S4.** Stacking patterns of Zn-DPDPE (a), Cd-DPDPE (b) and Hg-DPDPE (c) in crystal.

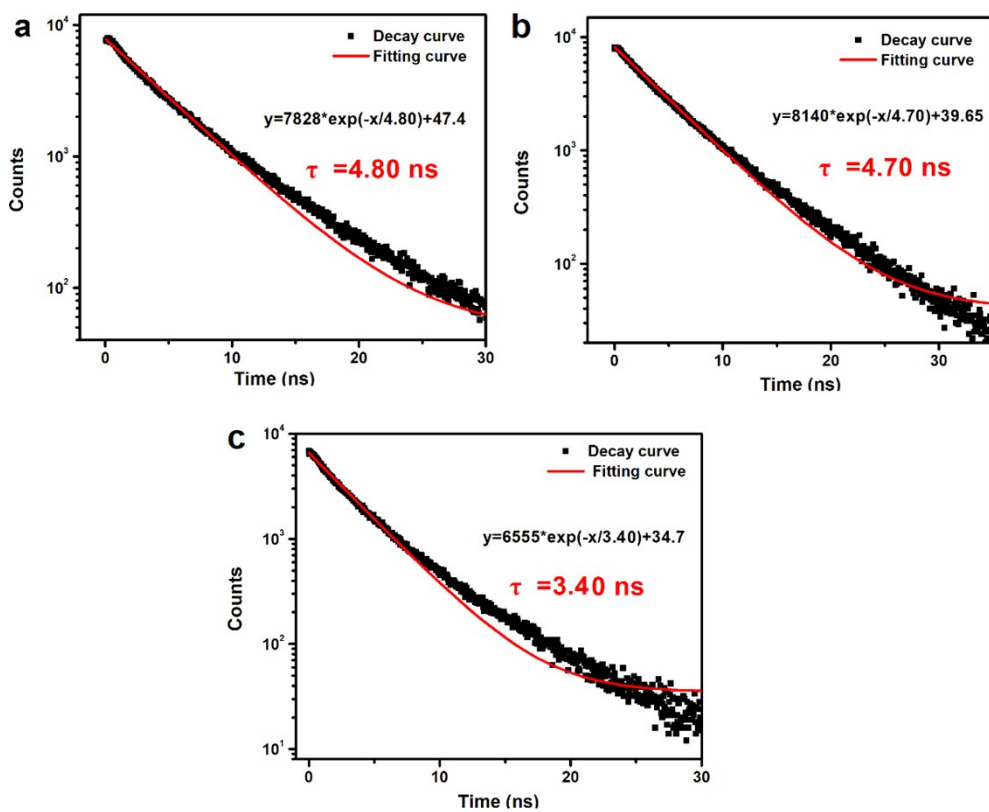

**Figure S5.** Time-resolved PL decay curves of Zn-DPDPE (a), Cd-DPDPE (b) and Hg-DPDPE (c) in solid at room temperature.

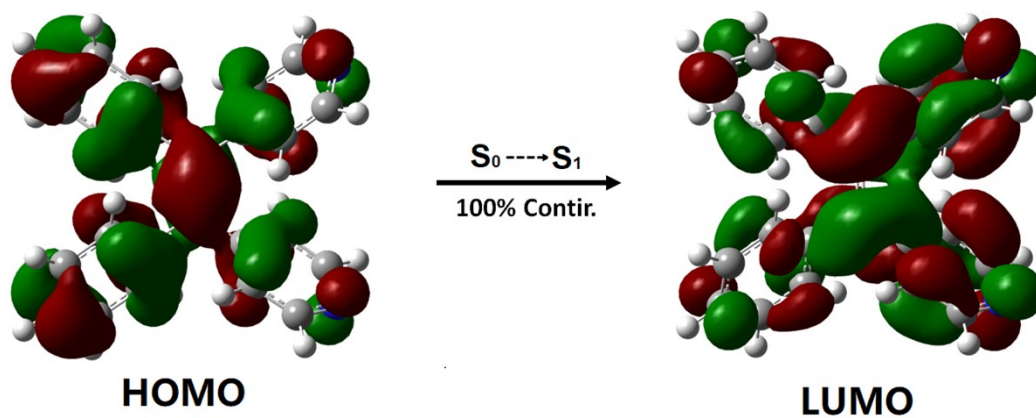

**Figure S6.** Natural transition orbitals of DPDPE for the transition from  $S_0$  to  $S_1$  with labeled contribution calculated with TDDFT.

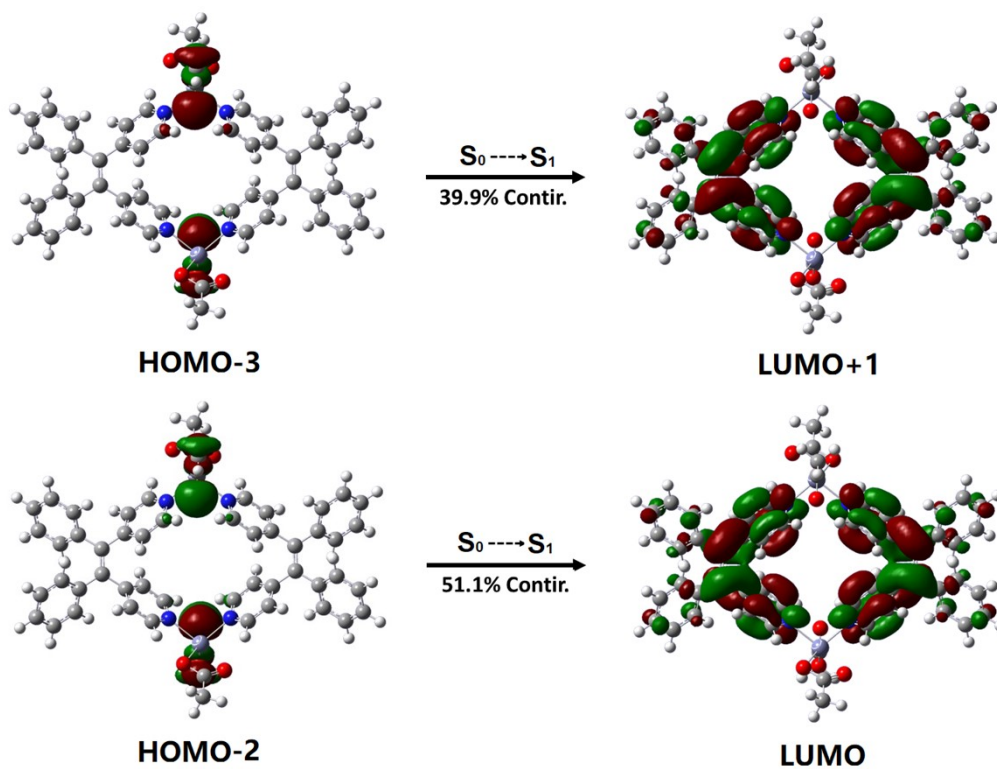

**Figure S7.** Natural transition orbitals of Zn-DPDPE for the transition from  $S_0$  to  $S_1$  with labeled contribution calculated with TDDFT.

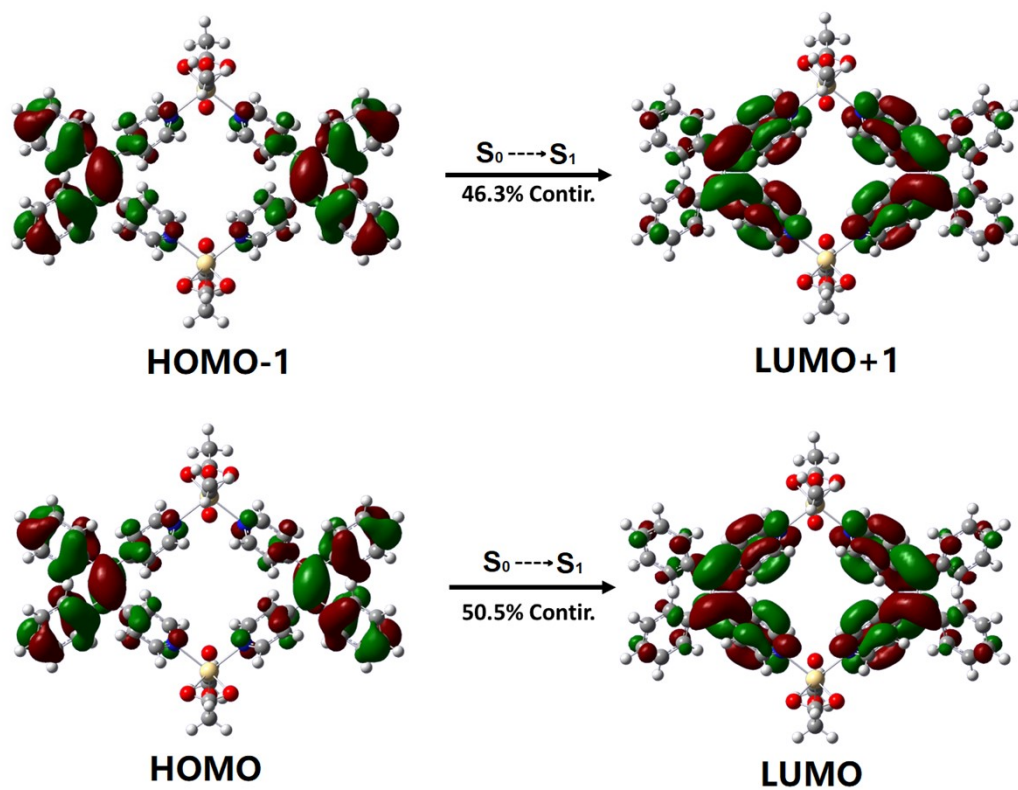

**Figure S8.** Natural Transition Orbitals of Cd-DPDPE for the transition from  $S_0$  to  $S_1$  with labeled contribution calculated with TDDFT.

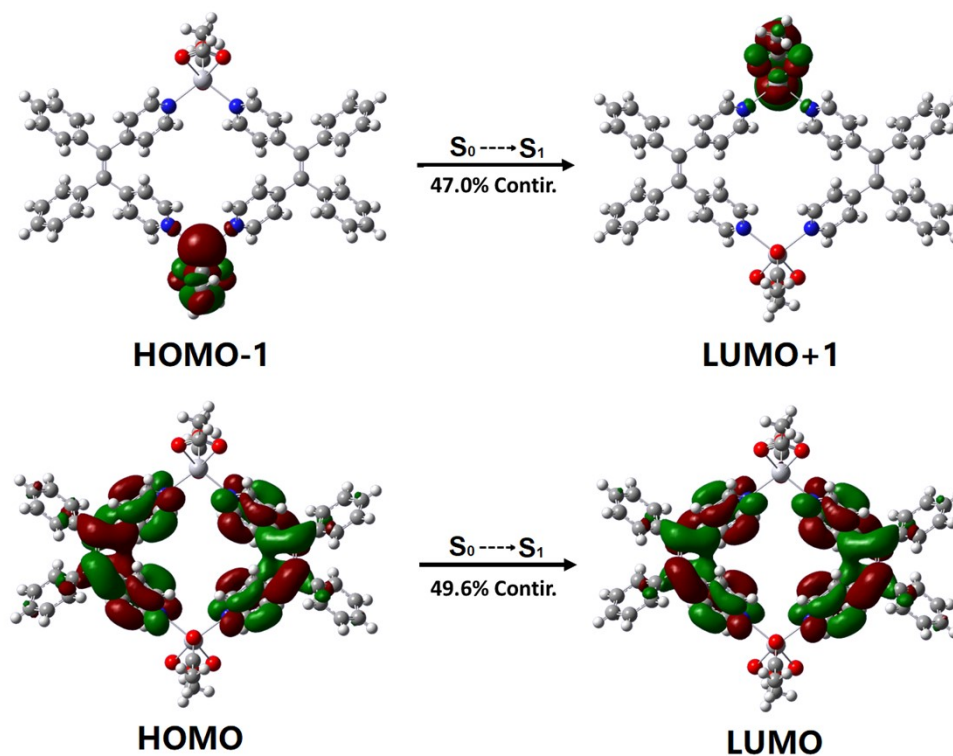

**Figure S9.** Natural Transition Orbitals of Hg-DPDPE for the transition from  $S_0$  to  $S_1$  with labeled contribution calculated with TDDFT.

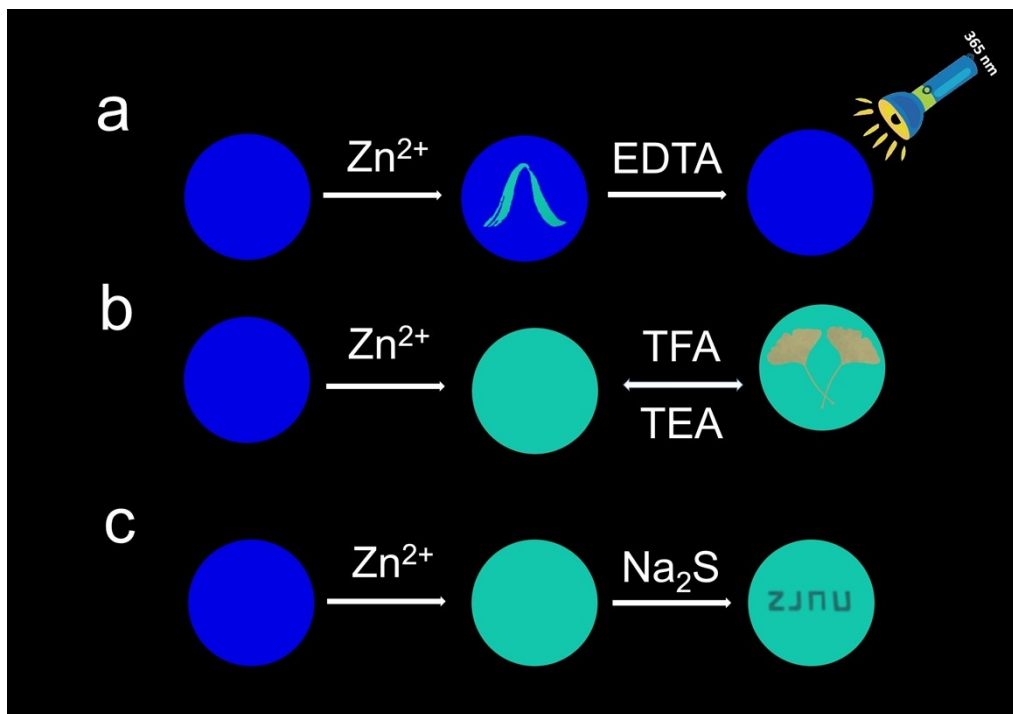

**Figure S10.** Controllable patterning demonstrations based on stimuli-responsive behaviours of DPDPE and its zinc complex. (a) A green pattern of mountain is written on a paper containing DPDPE with blue emission using zinc ion, and then is erased using EDTA. (b) The blue paper is firstly turned to green using zinc ion, then a yellow pattern of two leaves is drawn on the green paper using trifluoroacetic acid (TFA), and finally erased with triethenylamine (TEA). (c) The blue paper is firstly turned to green using zinc ion, and then a group of letters “ZJNU” is written on the green paper with quenched fluorescence using sodium sulfide.

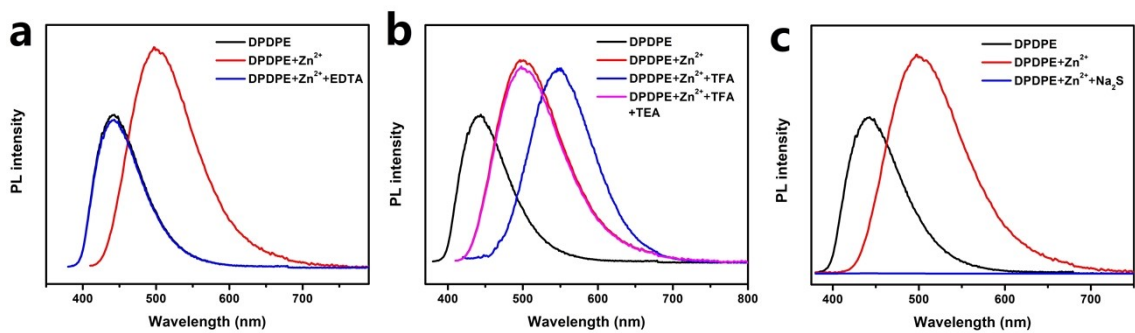

**Figure S11.** (a) PL spectra of DPDPE on a paper in the presence of different compositions: DPDPE, DPDPE+Zn<sup>2+</sup>, and DPDPE+Zn<sup>2+</sup>+EDTA. (b) PL spectra of DPDPE on a paper in the presence of different compositions: DPDPE, DPDPE+Zn<sup>2+</sup>, DPDPE+Zn<sup>2+</sup>+TFA, and DPDPE+Zn<sup>2+</sup>+TFA+TEA. (c) PL spectra of DPDPE on a paper in the presence of different compositions: DPDPE, DPDPE+Zn<sup>2+</sup>, and DPDPE+Zn<sup>2+</sup>+Na<sub>2</sub>S.

#### 4. Supplementary Tables

**Table S1.** Crystallographic data for Zn-DPDPE, Cd-DPDPE and Hg-DPDPE.

| source                 | Zn-DPDPE                                  | Cd-DPDPE                                            | Hg-DPDPE                                    |
|------------------------|-------------------------------------------|-----------------------------------------------------|---------------------------------------------|
| CCDC                   | 2170098                                   | 2170097                                             | 2170096                                     |
| Formula                | $C_{56}H_{48}N_4O_8Zn_2 \cdot 5(C_2H_3N)$ | $C_{52}H_{42}CdN_4O_4 \cdot 2(H_2O) \cdot 2(CH_4O)$ | $C_{56}H_{48}Hg_2N_4O_8 \cdot 2(C_4H_8O_2)$ |
| $D_{calc.}/g\ cm^{-3}$ | 1.249                                     | 1.345                                               | 1.628                                       |
| $\mu/mm^{-1}$          | 0.79                                      | 0.50                                                | 5.14                                        |
| Formula Weight         | 1240.99                                   | 999.41                                              | 1482.37                                     |
| Shape                  | block                                     | block                                               | block                                       |
| Crystal System         | triclinic                                 | monoclinic                                          | monoclinic                                  |
| Space Group            | P-1                                       | $P2_1/n$                                            | $C2/m$                                      |
| a (Å)                  | 8.1837 (18)                               | 9.8170 (5)                                          | 17.1620 (12)                                |
| b (Å)                  | 13.428 (3)                                | 9.5192 (5)                                          | 21.5993 (15)                                |
| c (Å)                  | 15.086 (4)                                | 26.5971 (12)                                        | 8.1568 (5)                                  |
| $\alpha$               | 86.984 (8)                                | 90                                                  | 90                                          |
| $\beta$                | 85.155 (8)                                | 96.935 (2)                                          | 90.374 (2)                                  |
| $\gamma$               | 89.371 (8)                                | 90                                                  | 90                                          |
| wavelength (Å)         | 0.71073                                   | 0.71073                                             | 0.71073                                     |
| Radiation type         | Mo $K\alpha$                              | Mo $K\alpha$                                        | Mo $K\alpha$                                |
| min/ $^\circ$          | 2.9                                       | 2.7                                                 | 2.9                                         |
| max/ $^\circ$          | 28.3                                      | 28.7                                                | 27.5                                        |
| Measured Refl's.       | 48270                                     | 25598                                               | 11516                                       |
| Ind't Refl's           | 8402                                      | 5647                                                | 3537                                        |
| $R_{int}$              | 0.053                                     | 0.042                                               | 0.043                                       |
| Parameters             | 457                                       | 344                                                 | 224                                         |
| GooF                   | 1.034                                     | 1.042                                               | 1.077                                       |
| w $R_2$ (all data)     | 0.1524                                    | 0.0860                                              | 0.0795                                      |
| w $R_2$                | 0.1368                                    | 0.0778                                              | 0.0728                                      |
| $R_1$ (all data)       | 0.0665                                    | 0.0455                                              | 0.0518                                      |
| $R_1$                  | 0.0482                                    | 0.0325                                              | 0.0361                                      |



**Table S2.** Photophysical properties of DPDPE, Zn-DPDPE, Cd-DPDPE and Hg-DPDPE in different states.

|                            | $\lambda_{ab}$ (nm) | $\lambda_{em}$ (nm) | $\tau$ (ns) | $\Phi$ (%) | $k_r$ ( $10^8$ s <sup>-1</sup> ) | $k_{nr}$ ( $10^8$ s <sup>-1</sup> ) |
|----------------------------|---------------------|---------------------|-------------|------------|----------------------------------|-------------------------------------|
|                            |                     |                     |             |            | 1)                               |                                     |
| <i>solid powder</i>        |                     |                     |             |            |                                  |                                     |
| DPDPE                      | —                   | 443                 | 1.73        | 12.6       | 0.73                             | 5.05                                |
| Zn-DPDPE                   | —                   | 500                 | 4.80        | 70.2       | 1.46                             | 0.62                                |
| Cd-DPDPE                   | —                   | 494                 | 4.70        | 65.2       | 1.39                             | 0.74                                |
| Hg-DPDPE                   | —                   | 472                 | 3.40        | 68.4       | 2.0                              | 0.93                                |
| <i>In solution at 77 K</i> |                     |                     |             |            |                                  |                                     |
| DPDPE                      | —                   | 449                 | 4.33        | —          | —                                | —                                   |
| Zn-DPDPE                   | —                   | 502                 | 6.38        | —          | —                                | —                                   |
| Cd-DPDPE                   | —                   | 497                 | 6.41        | —          | —                                | —                                   |
| Hg-DPDPE                   | —                   | 487                 | 6.01        | —          | —                                | —                                   |

**Table S3.** Compositions of Natural Transition Orbitals of DPDPE, Zn-DPDPE and Cd-DPDPE and Hg-DPDPE for the  $S_0 \rightarrow S_1$  transition.

|          | NTOs          | Contribution (%) |
|----------|---------------|------------------|
| DPDPE    | HOMO→LUMO     | 100              |
| Zn-DPDPE | HOMO-3→LUMO+1 | 39.9             |
|          | HOMO-2→LUMO   | 51.1             |
| Cd-DPDPE | HOMO-1→LUMO+1 | 46.3             |
|          | HOMO→LUMO     | 50.5             |
| Hg-DPDPE | HOMO-1→LUMO+1 | 47.0             |
|          | HOMO→LUMO     | 49.6             |

**Table S4.** Contribution ratios of different groups to natural transition orbitals of DPDPE, Zn-DPDPE,

Cd-DPDPE and Hg-DPDPE.

| Compound | Group                            | Contribution to HOMO(%)   | Contribution to LUMO(%) |
|----------|----------------------------------|---------------------------|-------------------------|
| DPDPE    |                                  | 100                       | 100                     |
| Compound | Group                            | Contribution to HOMO-2(%) | Contribution to LUMO(%) |
| Zn-DPDPE | DPDPE                            | 1.85                      | 99.58                   |
|          | Zn                               | 0.61                      | 0.34                    |
|          | CH <sub>3</sub> COO <sup>-</sup> | 97.53                     | 0.07                    |
| Compound | Group                            | Contribution to HOMO (%)  | Contribution to LUMO(%) |
| Cd-DPDPE | DPDPE                            | 99.94                     | 99.95                   |
|          | Cd                               | 0.02                      | 0.3                     |
|          | CH <sub>3</sub> COO <sup>-</sup> | 0.04                      | 0.04                    |
| Compound | Group                            | Contribution to HOMO (%)  | Contribution to LUMO(%) |
| Hg-DPDPE | DPDPE                            | 0.83                      | 99.53                   |
|          | Hg                               | 2.47                      | 0.4                     |
|          | CH <sub>3</sub> COO <sup>-</sup> | 96.71                     | 0.07                    |

**Table S5.** Experimental and calculated absorption and emission maxima of DPDPE, Zn-DPDPE, Cd-DPDPE and Hg-DPDPE in different states.

|          | $\lambda_{ab}^{exp}$ (nm) <sup>a</sup> | $\lambda_{ab}^{cal}$ (nm) <sup>b</sup> | $\lambda^{exp}$ (nm) <sup>c</sup> | $\lambda^{cal}$ (nm) <sup>d</sup> |
|----------|----------------------------------------|----------------------------------------|-----------------------------------|-----------------------------------|
| DPDPE    | 315                                    | 292.35                                 | 443                               | 598.50                            |
| Zn-DPDPE | 316                                    | 275.37                                 | 500                               | 593.37                            |
| Cd-DPDPE | 316                                    | 327.45                                 | 494                               | 579.55                            |
| Hg-DPDPE | 317                                    | 326.98                                 | 472                               | 585.92                            |

<sup>a</sup> Experimental absorption maximum in TCM/MeOH. <sup>b</sup> Calculated absorption maximum with TDDFT.

<sup>c</sup> Experimental emission maximum in solid. <sup>d</sup> Calculated emission maximum with TDDFT.

## 5. NMR and MS Spectra of Compounds

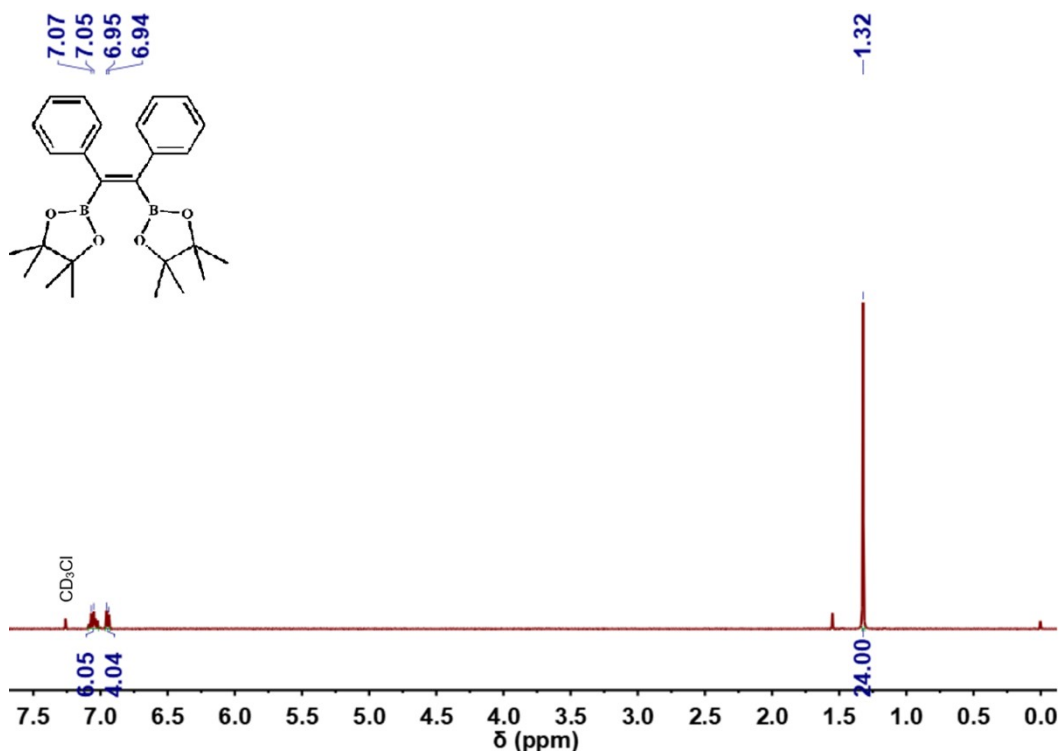

Figure S9. <sup>1</sup>H NMR spectrum of DPDBE in CDCl<sub>3</sub>.

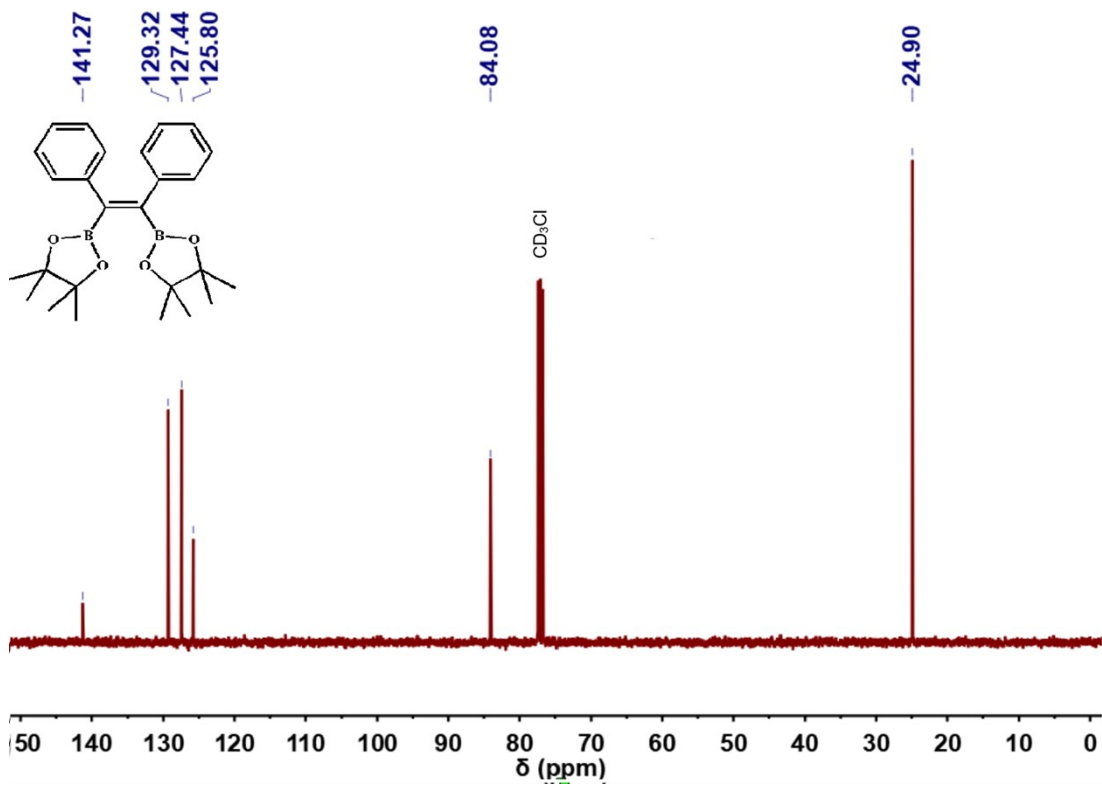

Figure S10. <sup>13</sup>C NMR spectrum of DBDBE in CDCl<sub>3</sub>.

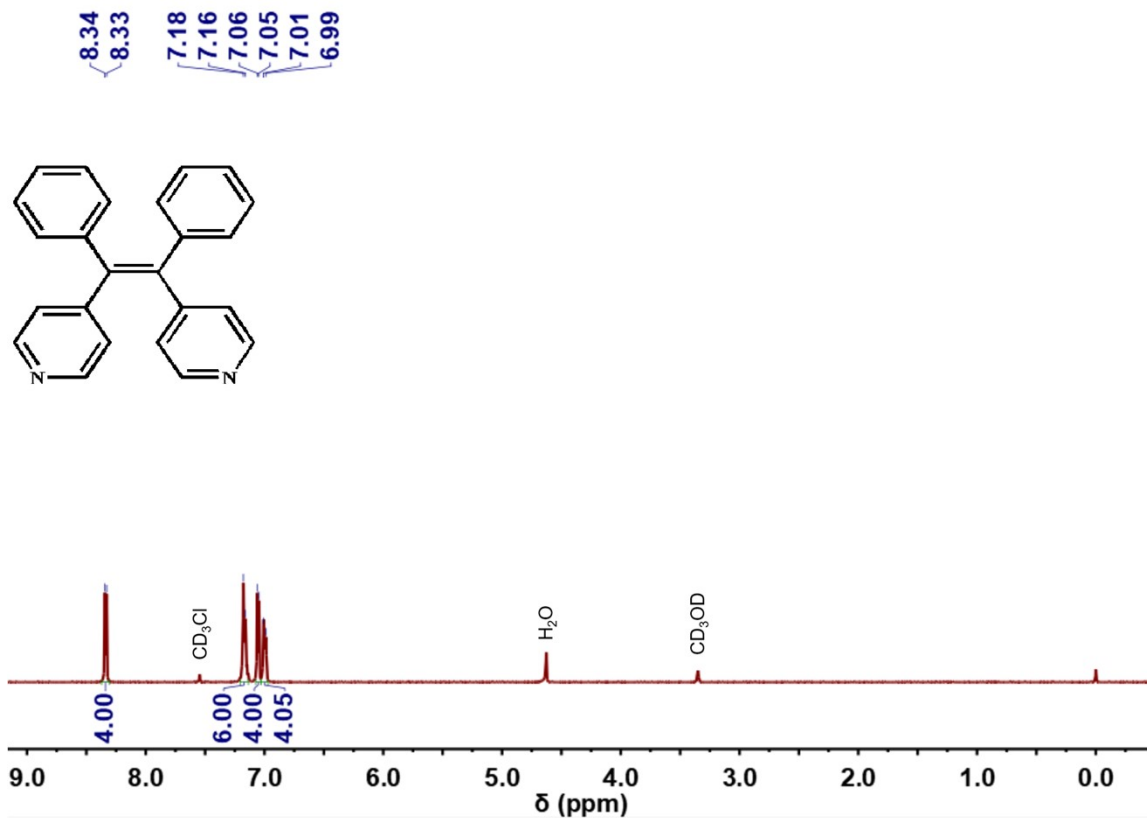

Figure S11. <sup>1</sup>H NMR spectrum of DPDPE in CDCl<sub>3</sub>/CD<sub>3</sub>OD (3:2).

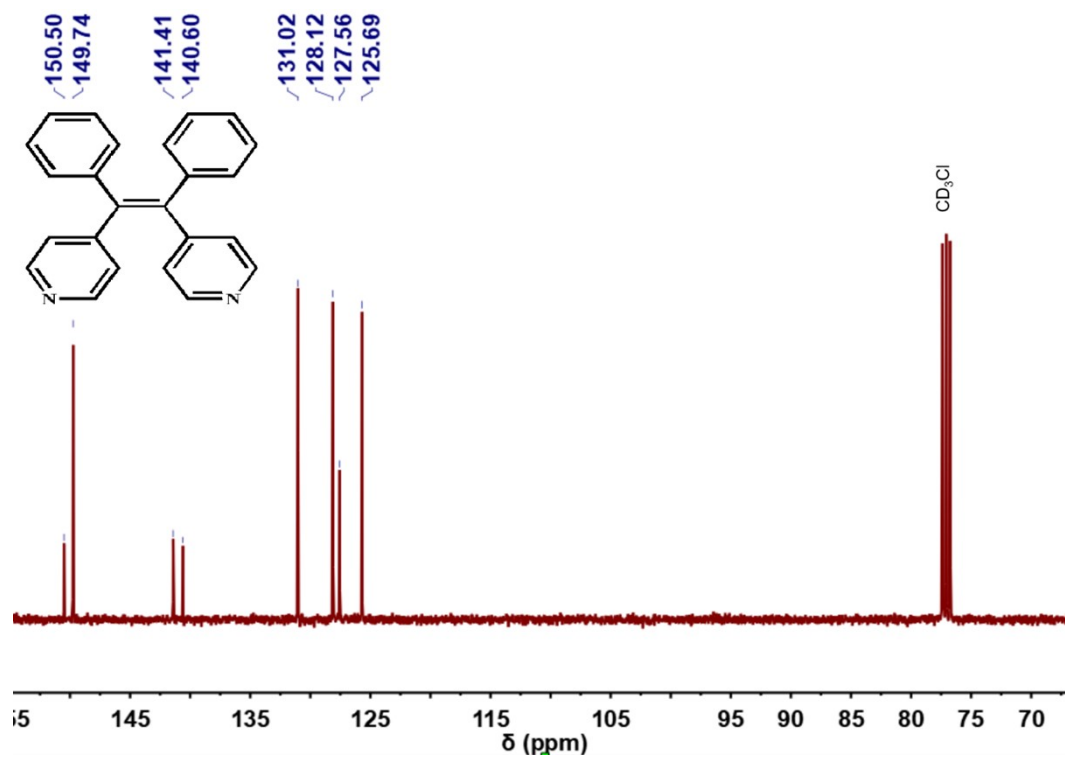

Figure S12. <sup>13</sup>C NMR spectrum of DPDPE in CDCl<sub>3</sub>/CD<sub>3</sub>OD (3:2).

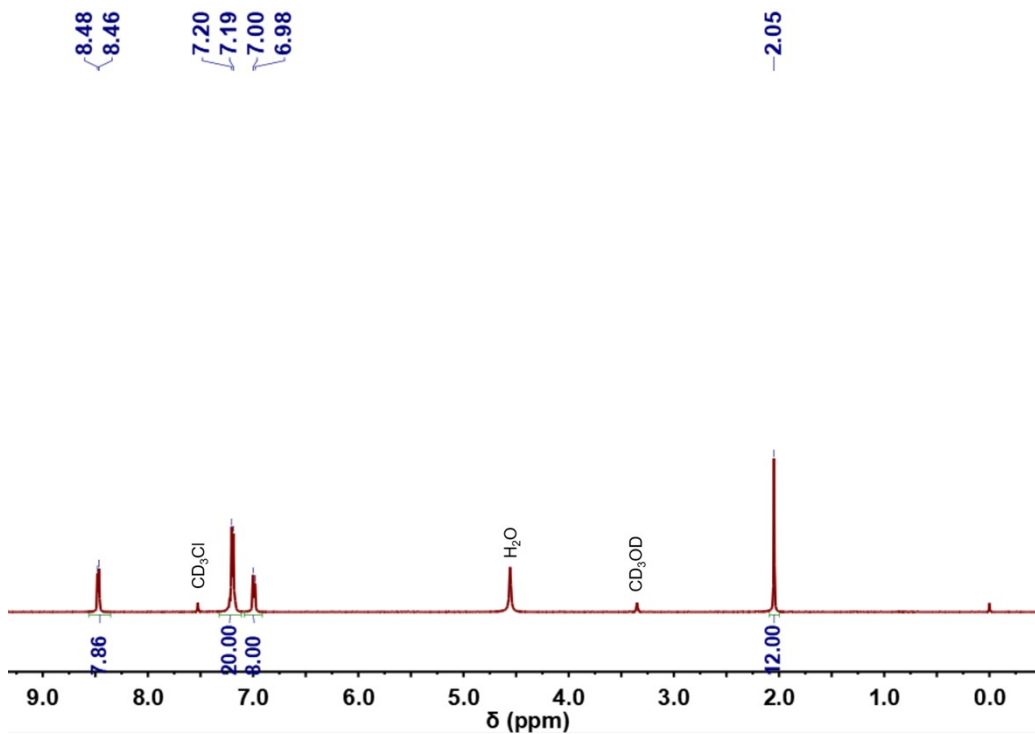

Figure S13. <sup>1</sup>H NMR spectrum of Zn-DPDPE in CDCl<sub>3</sub>/CD<sub>3</sub>OD(3:2).

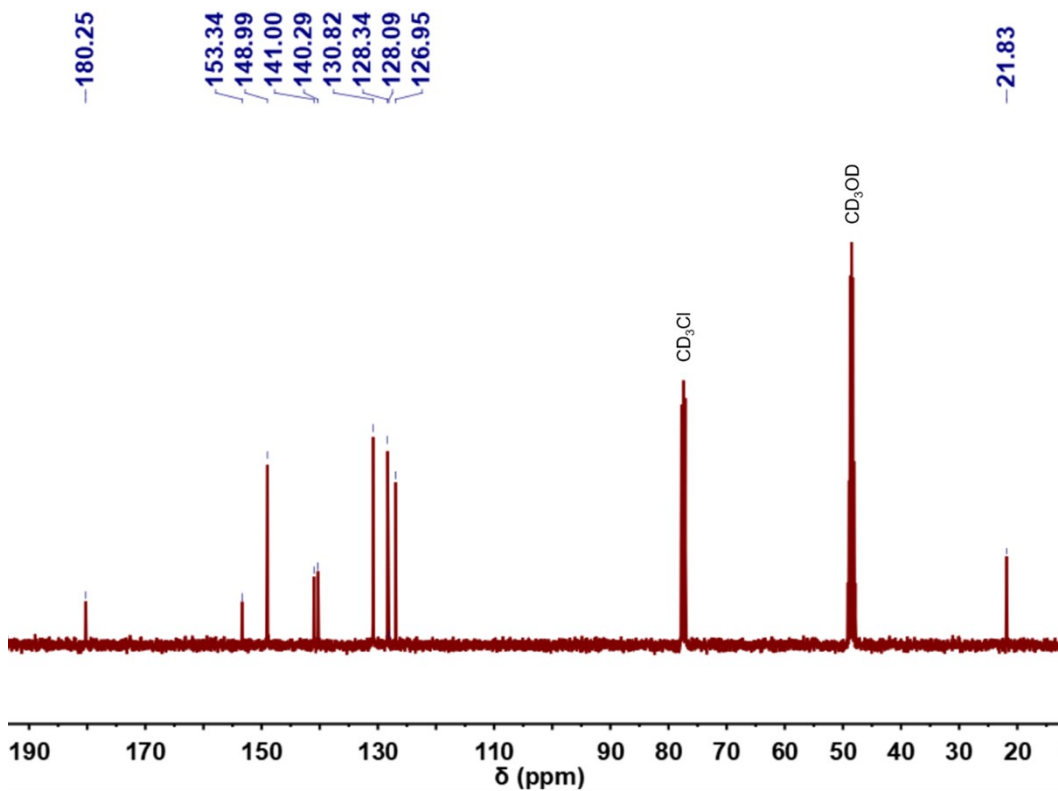

Figure S14. <sup>13</sup>C NMR spectrum of Zn-DPDPE in CDCl<sub>3</sub>/CD<sub>3</sub>OD (3:2).

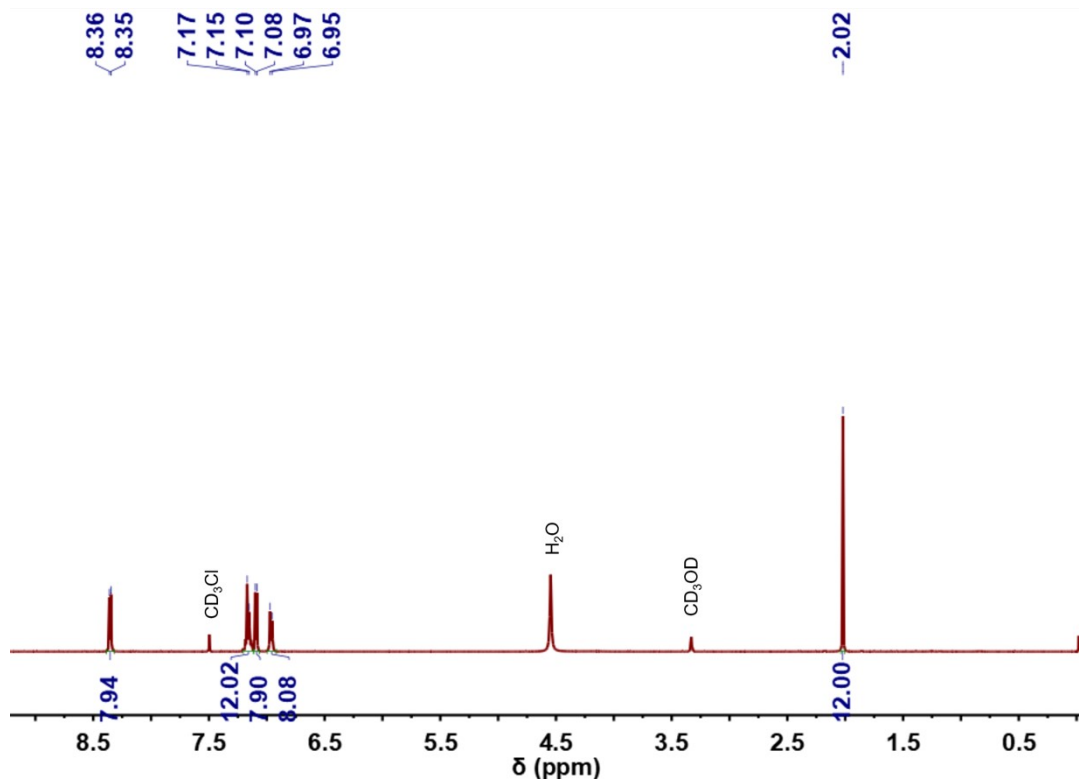

Figure S15. <sup>1</sup>H NMR spectrum of Cd-DPDPE in CDCl<sub>3</sub>/CD<sub>3</sub>OD (3:2).

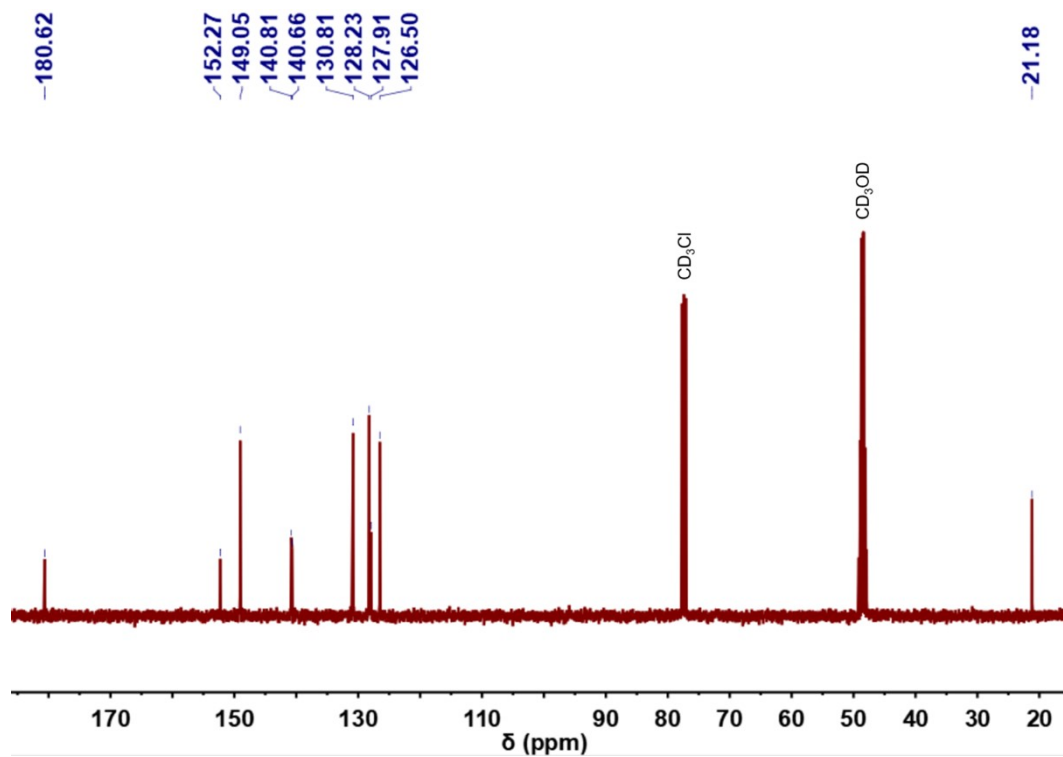

Figure S16. <sup>13</sup>C NMR spectrum of Cd-DPDPE in CDCl<sub>3</sub>/CD<sub>3</sub>OD (3:2).

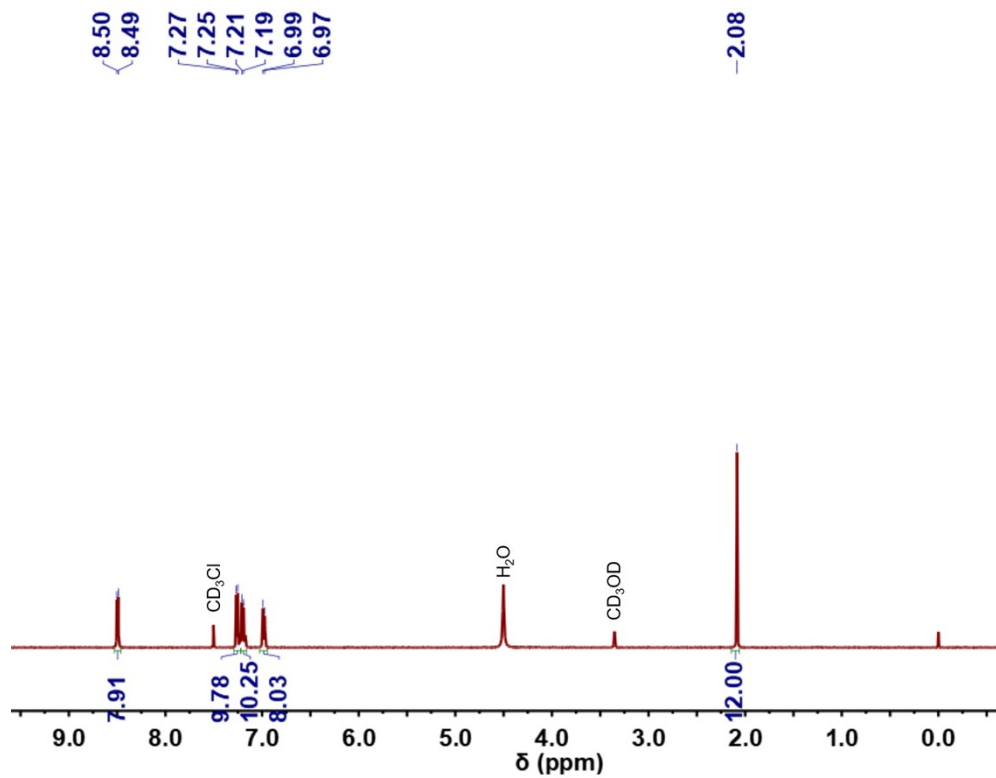

Figure S17. <sup>1</sup>H NMR spectrum of Hg-DPDPE in CDCl<sub>3</sub>/CD<sub>3</sub>OD (3:2).

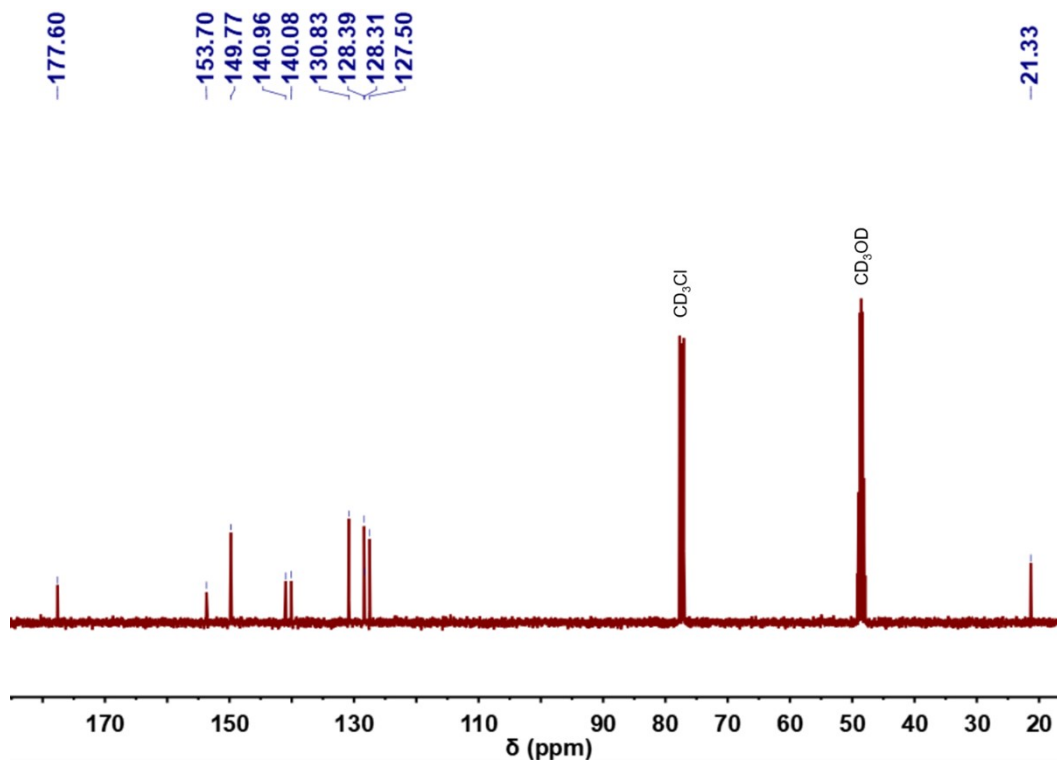

Figure S18. <sup>13</sup>C NMR spectrum of Cd-DPDPE in CDCl<sub>3</sub>/CD<sub>3</sub>OD (3:2).

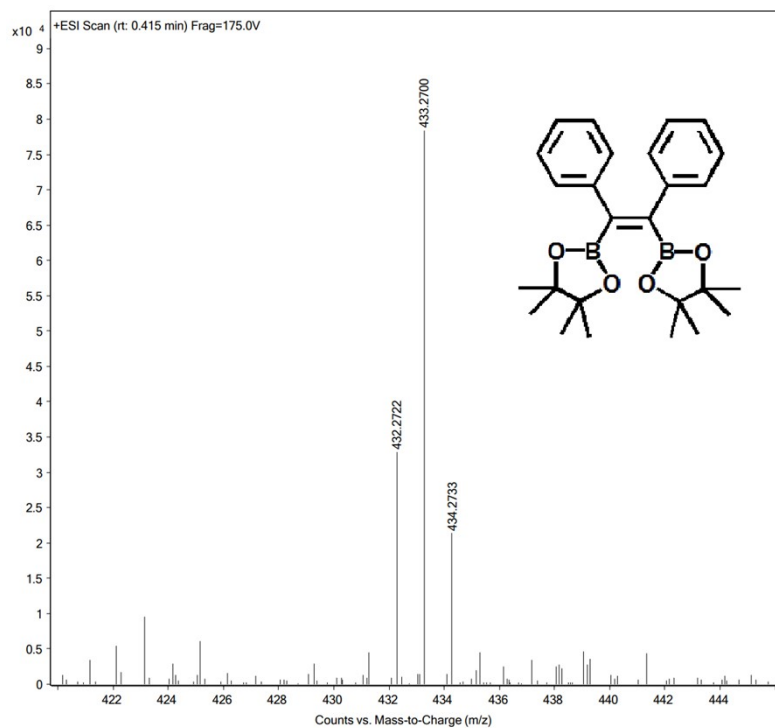

**Figure S19.** High-resolution mass spectrum of DPDBE.

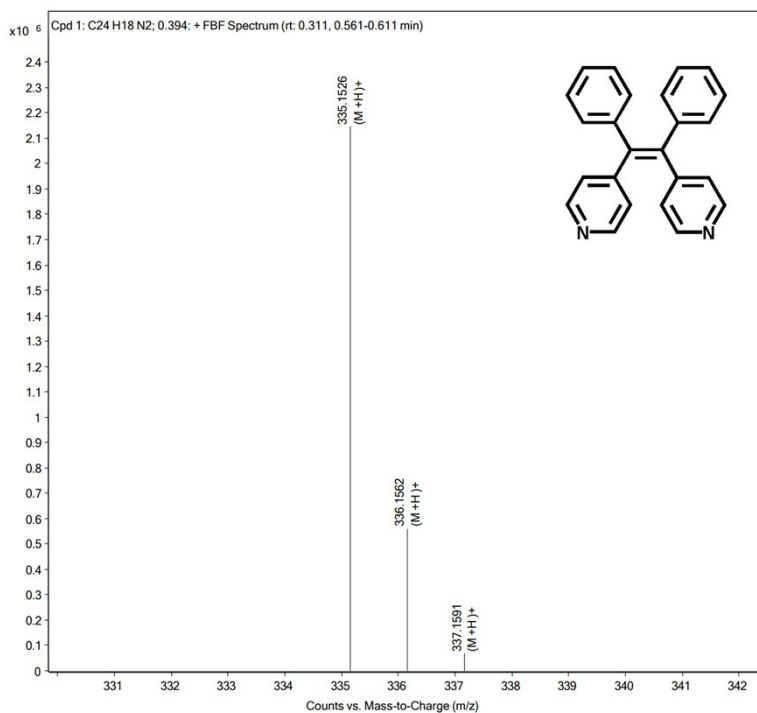

**Figure S20.** High-resolution mass spectrum of DPDPE.



## 6. Cartesian Coordinates

### DPDPE

|   |            |             |             |
|---|------------|-------------|-------------|
| N | 6.81620000 | 6.92990000  | 4.57080000  |
| N | 2.71550000 | 9.80550000  | 8.35330000  |
| C | 4.59770000 | 11.48980000 | 1.47180000  |
| H | 3.69390000 | 11.29660000 | 1.57880000  |
| C | 5.06560000 | 11.96590000 | 0.25700000  |
| H | 4.47260000 | 12.08810000 | -0.44860000 |
| C | 6.38780000 | 12.25630000 | 0.08550000  |
| H | 6.69400000 | 12.57670000 | -0.73260000 |
| C | 7.25420000 | 12.07260000 | 1.11610000  |
| H | 8.15610000 | 12.27030000 | 1.00470000  |
| C | 6.80230000 | 11.59620000 | 2.32640000  |
| H | 7.40370000 | 11.47140000 | 3.02440000  |
| C | 5.46770000 | 11.30250000 | 2.51630000  |
| C | 5.01680000 | 10.75590000 | 3.82720000  |
| C | 4.15710000 | 11.39020000 | 4.63430000  |
| C | 3.56400000 | 12.71850000 | 4.30420000  |
| C | 2.19960000 | 12.84210000 | 4.18630000  |
| H | 1.66270000 | 12.09440000 | 4.31790000  |
| C | 1.60520000 | 14.06020000 | 3.87500000  |
| H | 0.68150000 | 14.12160000 | 3.78930000  |
| C | 2.39270000 | 15.17050000 | 3.69500000  |
| H | 2.00470000 | 15.98970000 | 3.48790000  |
| C | 3.77450000 | 15.06180000 | 3.82480000  |
| H | 4.31070000 | 15.81250000 | 3.70730000  |
| C | 4.34940000 | 13.85110000 | 4.12550000  |
| H | 5.27370000 | 13.78870000 | 4.21050000  |
| C | 3.35310000 | 10.98320000 | 8.29120000  |
| H | 3.47690000 | 11.46580000 | 9.07640000  |
| C | 3.83020000 | 11.50580000 | 7.11240000  |
| H | 4.26020000 | 12.33060000 | 7.11270000  |
| C | 3.67540000 | 10.80920000 | 5.92280000  |
| C | 3.02600000 | 9.58470000  | 5.99730000  |
| H | 2.90630000 | 9.07350000  | 5.22960000  |
| C | 2.55900000 | 9.12740000  | 7.21030000  |
| H | 2.11470000 | 8.31060000  | 7.23570000  |
| C | 6.98130000 | 7.94320000  | 5.42650000  |
| H | 7.52150000 | 7.81030000  | 6.17180000  |
| C | 6.38470000 | 9.18590000  | 5.25490000  |

|   |            |            |            |
|---|------------|------------|------------|
| H | 6.50300000 | 9.85400000 | 5.89090000 |
| C | 5.61650000 | 9.42160000 | 4.13830000 |
| C | 5.44540000 | 8.37220000 | 3.25440000 |
| H | 4.92340000 | 8.48600000 | 2.49330000 |
| C | 6.04670000 | 7.16120000 | 3.49940000 |
| H | 5.91370000 | 6.46950000 | 2.89220000 |

**Zn-DPDPE**

|    |            |             |             |
|----|------------|-------------|-------------|
| Zn | 7.63920000 | 5.07840000  | 4.84320000  |
| O  | 7.70340000 | 4.77670000  | 2.08890000  |
| O  | 6.77110000 | 3.70560000  | 3.73140000  |
| O  | 9.57120000 | 6.20400000  | 6.40180000  |
| O  | 9.56440000 | 4.89590000  | 4.67780000  |
| N  | 2.75570000 | 7.28020000  | 10.43120000 |
| N  | 6.85640000 | 4.40450000  | 6.64870000  |
| C  | 4.97420000 | 2.72030000  | 13.53010000 |
| H  | 5.87800000 | 2.91340000  | 13.42320000 |
| C  | 4.50630000 | 2.24420000  | 14.74500000 |
| H  | 5.09930000 | 2.12190000  | 15.45060000 |
| C  | 3.18410000 | 1.95380000  | 14.91650000 |
| H  | 2.87790000 | 1.63340000  | 15.73460000 |
| C  | 2.31770000 | 2.13750000  | 13.88580000 |
| H  | 1.41580000 | 1.93980000  | 13.99730000 |
| C  | 2.76960000 | 2.61390000  | 12.67560000 |
| H  | 2.16820000 | 2.73860000  | 11.97760000 |
| C  | 4.10420000 | 2.90760000  | 12.48570000 |
| C  | 4.55510000 | 3.45420000  | 11.17480000 |
| C  | 5.41480000 | 2.81990000  | 10.36770000 |
| C  | 6.00790000 | 1.49160000  | 10.69780000 |
| C  | 7.37230000 | 1.36800000  | 10.81570000 |
| H  | 7.90920000 | 2.11560000  | 10.68410000 |
| C  | 7.96670000 | 0.14990000  | 11.12700000 |
| H  | 8.89040000 | 0.08850000  | 11.21270000 |
| C  | 7.17930000 | -0.96040000 | 11.30700000 |
| H  | 7.56720000 | -1.77960000 | 11.51400000 |
| C  | 5.79740000 | -0.85170000 | 11.17720000 |
| H  | 5.26120000 | -1.60250000 | 11.29470000 |
| C  | 5.22250000 | 0.35900000  | 10.87640000 |
| H  | 4.29820000 | 0.42130000  | 10.79150000 |
| C  | 6.21880000 | 3.22690000  | 6.71080000  |
| H  | 6.09500000 | 2.74430000  | 5.92560000  |

|    |             |             |             |
|----|-------------|-------------|-------------|
| C  | 5.74170000  | 2.70430000  | 7.88950000  |
| H  | 5.31170000  | 1.87950000  | 7.88920000  |
| C  | 5.89650000  | 3.40090000  | 9.07920000  |
| C  | 6.54590000  | 4.62540000  | 9.00460000  |
| H  | 6.66560000  | 5.13660000  | 9.77240000  |
| C  | 7.01290000  | 5.08270000  | 7.79170000  |
| H  | 7.45720000  | 5.89940000  | 7.76630000  |
| C  | 2.59060000  | 6.26680000  | 9.57550000  |
| H  | 2.05040000  | 6.39970000  | 8.83010000  |
| C  | 3.18720000  | 5.02420000  | 9.74710000  |
| H  | 3.06890000  | 4.35610000  | 9.11110000  |
| C  | 3.95540000  | 4.78850000  | 10.86370000 |
| C  | 4.12650000  | 5.83780000  | 11.74760000 |
| H  | 4.64850000  | 5.72410000  | 12.50860000 |
| C  | 3.52520000  | 7.04890000  | 11.50260000 |
| H  | 3.65820000  | 7.74060000  | 12.10980000 |
| C  | 10.17520000 | 5.57300000  | 5.55840000  |
| C  | 11.67550000 | 5.55390000  | 5.56570000  |
| H  | 12.00330000 | 5.82480000  | 4.70570000  |
| H  | 11.98310000 | 4.66590000  | 5.76130000  |
| H  | 11.99930000 | 6.15940000  | 6.23730000  |
| C  | 7.08470000  | 3.79010000  | 2.54420000  |
| C  | 6.69520000  | 2.67630000  | 1.62920000  |
| H  | 6.45260000  | 1.90500000  | 2.14740000  |
| H  | 7.43490000  | 2.45710000  | 1.05740000  |
| H  | 5.94670000  | 2.94880000  | 1.09270000  |
| Zn | 1.93270000  | 9.13170000  | 10.15870000 |
| O  | 1.86850000  | 9.43340000  | 12.91310000 |
| O  | 2.80090000  | 10.50440000 | 11.27050000 |
| O  | 0.00070000  | 8.00610000  | 8.60020000  |
| O  | 0.00750000  | 9.31420000  | 10.32420000 |
| N  | 6.81620000  | 6.92990000  | 4.57080000  |
| N  | 2.71550000  | 9.80550000  | 8.35330000  |
| C  | 4.59770000  | 11.48980000 | 1.47180000  |
| H  | 3.69390000  | 11.29660000 | 1.57880000  |
| C  | 5.06560000  | 11.96590000 | 0.25700000  |
| H  | 4.47260000  | 12.08810000 | -0.44860000 |
| C  | 6.38780000  | 12.25630000 | 0.08550000  |
| H  | 6.69400000  | 12.57670000 | -0.73260000 |
| C  | 7.25420000  | 12.07260000 | 1.11610000  |
| H  | 8.15610000  | 12.27030000 | 1.00470000  |

|   |             |             |             |
|---|-------------|-------------|-------------|
| C | 6.80230000  | 11.59620000 | 2.32640000  |
| H | 7.40370000  | 11.47140000 | 3.02440000  |
| C | 5.46770000  | 11.30250000 | 2.51630000  |
| C | 5.01680000  | 10.75590000 | 3.82720000  |
| C | 4.15710000  | 11.39020000 | 4.63430000  |
| C | 3.56400000  | 12.71850000 | 4.30420000  |
| C | 2.19960000  | 12.84210000 | 4.18630000  |
| H | 1.66270000  | 12.09440000 | 4.31790000  |
| C | 1.60520000  | 14.06020000 | 3.87500000  |
| H | 0.68150000  | 14.12160000 | 3.78930000  |
| C | 2.39270000  | 15.17050000 | 3.69500000  |
| H | 2.00470000  | 15.98970000 | 3.48790000  |
| C | 3.77450000  | 15.06180000 | 3.82480000  |
| H | 4.31070000  | 15.81250000 | 3.70730000  |
| C | 4.34940000  | 13.85110000 | 4.12550000  |
| H | 5.27370000  | 13.78870000 | 4.21050000  |
| C | 3.35310000  | 10.98320000 | 8.29120000  |
| H | 3.47690000  | 11.46580000 | 9.07640000  |
| C | 3.83020000  | 11.50580000 | 7.11240000  |
| H | 4.26020000  | 12.33060000 | 7.11270000  |
| C | 3.67540000  | 10.80920000 | 5.92280000  |
| C | 3.02600000  | 9.58470000  | 5.99730000  |
| H | 2.90630000  | 9.07350000  | 5.22960000  |
| C | 2.55900000  | 9.12740000  | 7.21030000  |
| H | 2.11470000  | 8.31060000  | 7.23570000  |
| C | 6.98130000  | 7.94320000  | 5.42650000  |
| H | 7.52150000  | 7.81030000  | 6.17180000  |
| C | 6.38470000  | 9.18590000  | 5.25490000  |
| H | 6.50300000  | 9.85400000  | 5.89090000  |
| C | 5.61650000  | 9.42160000  | 4.13830000  |
| C | 5.44540000  | 8.37220000  | 3.25440000  |
| H | 4.92340000  | 8.48600000  | 2.49330000  |
| C | 6.04670000  | 7.16120000  | 3.49940000  |
| H | 5.91370000  | 6.46950000  | 2.89220000  |
| C | -0.60330000 | 8.63710000  | 9.44360000  |
| C | -2.10360000 | 8.65620000  | 9.43630000  |
| H | -2.43140000 | 8.38530000  | 10.29620000 |
| H | -2.41120000 | 9.54420000  | 9.24070000  |
| H | -2.42740000 | 8.05060000  | 8.76470000  |
| C | 2.48720000  | 10.42000000 | 12.45780000 |
| C | 2.87670000  | 11.53380000 | 13.37280000 |

|   |            |             |             |
|---|------------|-------------|-------------|
| H | 3.11930000 | 12.30500000 | 12.85460000 |
| H | 2.13700000 | 11.75300000 | 13.94460000 |
| H | 3.62520000 | 11.26130000 | 13.90930000 |

**Cd-DPDPE**

|    |             |             |             |
|----|-------------|-------------|-------------|
| Cd | -1.60570000 | 4.75960000  | 13.20130000 |
| O  | -1.14270000 | 6.90140000  | 12.60690000 |
| O  | -3.10060000 | 7.69720000  | 12.01260000 |
| C  | -1.86970000 | 7.76200000  | 12.07100000 |
| C  | -1.16510000 | 8.95380000  | 11.44340000 |
| H  | -1.80090000 | 9.65790000  | 11.29280000 |
| H  | -0.77510000 | 8.69100000  | 10.60680000 |
| H  | -0.47630000 | 9.26620000  | 12.03420000 |
| O  | -2.06870000 | 2.61780000  | 13.79560000 |
| O  | -0.11080000 | 1.82200000  | 14.38990000 |
| C  | -1.34170000 | 1.75720000  | 14.33150000 |
| C  | -2.04630000 | 0.56540000  | 14.95910000 |
| H  | -1.41050000 | -0.13870000 | 15.10970000 |
| H  | -2.43630000 | 0.82820000  | 15.79570000 |
| H  | -2.73510000 | 0.25300000  | 14.36830000 |
| N  | -0.03040000 | 5.28130000  | 14.93110000 |
| N  | 0.12180000  | 4.19890000  | 11.60550000 |
| Cd | 8.21130000  | 4.75960000  | 13.20130000 |
| N  | 6.63600000  | 4.23790000  | 11.47140000 |
| O  | 8.67430000  | 6.90140000  | 12.60690000 |
| O  | 6.71640000  | 7.69720000  | 12.01260000 |
| C  | 4.83980000  | 3.53640000  | 9.41040000  |
| C  | 2.62680000  | 3.32510000  | 8.23440000  |
| C  | 1.82160000  | 3.64200000  | 9.45500000  |
| C  | 3.97120000  | 3.19940000  | 8.24680000  |
| C  | 1.78730000  | 3.18510000  | 7.00880000  |
| C  | 5.99590000  | 2.79860000  | 9.67200000  |
| H  | 6.19740000  | 2.05200000  | 9.15490000  |
| C  | 1.75090000  | 2.79860000  | 10.55260000 |
| H  | 2.27950000  | 2.03400000  | 10.59160000 |
| C  | 2.12970000  | 3.77720000  | 5.79960000  |
| H  | 2.93870000  | 4.23000000  | 5.72660000  |
| C  | 4.71570000  | 2.76720000  | 7.02520000  |
| C  | 7.94730000  | 7.76200000  | 12.07100000 |
| C  | 5.52000000  | 4.94810000  | 11.23560000 |
| H  | 5.34840000  | 5.68770000  | 11.77300000 |

|   |             |            |             |
|---|-------------|------------|-------------|
| C | 1.03430000  | 4.77860000 | 9.46240000  |
| H | 1.04950000  | 5.36610000 | 8.74130000  |
| C | 6.83670000  | 3.17270000 | 10.69280000 |
| H | 7.59060000  | 2.65180000 | 10.85040000 |
| C | 0.88650000  | 3.10330000 | 11.58940000 |
| H | 0.83620000  | 2.51720000 | 12.31000000 |
| C | 4.61260000  | 4.64060000 | 10.23700000 |
| H | 3.85410000  | 5.16570000 | 10.11660000 |
| C | 4.52730000  | 1.50970000 | 6.49130000  |
| H | 3.96550000  | 0.90020000 | 6.91230000  |
| C | 0.22190000  | 5.03280000 | 10.55650000 |
| H | -0.27660000 | 5.81810000 | 10.56540000 |
| C | 1.29140000  | 3.70490000 | 4.70180000  |
| H | 1.53820000  | 4.11410000 | 3.90370000  |
| C | 5.57720000  | 3.64780000 | 6.39070000  |
| H | 5.74390000  | 4.48190000 | 6.76650000  |
| C | 0.09350000  | 3.03090000 | 4.78390000  |
| H | -0.47080000 | 2.98510000 | 4.04590000  |
| C | 0.57440000  | 2.51780000 | 7.06930000  |
| H | 0.31260000  | 2.12080000 | 7.86870000  |
| C | 5.18810000  | 1.16320000 | 5.31240000  |
| H | 5.08980000  | 0.30590000 | 4.96490000  |
| C | 5.98000000  | 2.07330000 | 4.66110000  |
| H | 6.37220000  | 1.84830000 | 3.84840000  |
| C | 8.65190000  | 8.95380000 | 11.44340000 |
| H | 8.01610000  | 9.65790000 | 11.29280000 |
| H | 9.04190000  | 8.69100000 | 10.60680000 |
| H | 9.34070000  | 9.26620000 | 12.03420000 |
| C | -0.26070000 | 2.42830000 | 5.96120000  |
| H | -1.06070000 | 1.95760000 | 6.01950000  |
| C | 6.19280000  | 3.29270000 | 5.19570000  |
| H | 6.75170000  | 3.89800000 | 4.76430000  |
| N | 6.48380000  | 5.32030000 | 14.79700000 |
| C | 1.76580000  | 5.98280000 | 16.99210000 |
| C | 3.97880000  | 6.19410000 | 18.16810000 |
| C | 4.78400000  | 5.87720000 | 16.94750000 |
| C | 2.63440000  | 6.31980000 | 18.15570000 |
| C | 4.81830000  | 6.33410000 | 19.39370000 |
| C | 0.60970000  | 6.72060000 | 16.73050000 |
| H | 0.40820000  | 7.46720000 | 17.24770000 |
| C | 4.85470000  | 6.72060000 | 15.85000000 |

|   |             |             |             |
|---|-------------|-------------|-------------|
| H | 4.32610000  | 7.48520000  | 15.81090000 |
| C | 4.47590000  | 5.74200000  | 20.60290000 |
| H | 3.66690000  | 5.28920000  | 20.67590000 |
| C | 1.88990000  | 6.75200000  | 19.37730000 |
| C | 1.08560000  | 4.57110000  | 15.16690000 |
| H | 1.25710000  | 3.83150000  | 14.62950000 |
| C | 5.57130000  | 4.74060000  | 16.94010000 |
| H | 5.55610000  | 4.15310000  | 17.66120000 |
| C | -0.23110000 | 6.34650000  | 15.70980000 |
| H | -0.98510000 | 6.86740000  | 15.55210000 |
| C | 5.71900000  | 6.41590000  | 14.81310000 |
| H | 5.76940000  | 7.00200000  | 14.09250000 |
| C | 1.99290000  | 4.87860000  | 16.16550000 |
| H | 2.75150000  | 4.35350000  | 16.28590000 |
| C | 2.07830000  | 8.00950000  | 19.91120000 |
| H | 2.64010000  | 8.61900000  | 19.49020000 |
| C | 6.38370000  | 4.48640000  | 15.84600000 |
| H | 6.88220000  | 3.70110000  | 15.83710000 |
| C | 5.31420000  | 5.81430000  | 21.70080000 |
| H | 5.06730000  | 5.40510000  | 22.49880000 |
| C | 1.02840000  | 5.87140000  | 20.01180000 |
| H | 0.86170000  | 5.03730000  | 19.63600000 |
| C | 6.51200000  | 6.48830000  | 21.61860000 |
| H | 7.07630000  | 6.53410000  | 22.35660000 |
| C | 6.03120000  | 7.00140000  | 19.33320000 |
| H | 6.29300000  | 7.39840000  | 18.53380000 |
| C | 1.41750000  | 8.35600000  | 21.09010000 |
| H | 1.51580000  | 9.21330000  | 21.43760000 |
| C | 0.62560000  | 7.44590000  | 21.74140000 |
| H | 0.23340000  | 7.67090000  | 22.55410000 |
| C | 6.86630000  | 7.09090000  | 20.44140000 |
| H | 7.66630000  | 7.56160000  | 20.38300000 |
| C | 0.41280000  | 6.22650000  | 21.20680000 |
| H | -0.14610000 | 5.62120000  | 21.63820000 |
| O | 7.74830000  | 2.61780000  | 13.79560000 |
| O | 9.70620000  | 1.82200000  | 14.38990000 |
| C | 8.47530000  | 1.75720000  | 14.33150000 |
| C | 7.77070000  | 0.56540000  | 14.95910000 |
| H | 8.40650000  | -0.13870000 | 15.10970000 |
| H | 7.38070000  | 0.82820000  | 15.79570000 |
| H | 7.08190000  | 0.25300000  | 14.36830000 |

**Hg-DPDPE**

|    |             |             |             |
|----|-------------|-------------|-------------|
| Hg | 11.93740000 | 10.79960000 | 5.06400000  |
| N  | 10.87750000 | 8.97880000  | 6.01310000  |
| O  | 12.15290000 | 10.79960000 | 2.82380000  |
| O  | 10.05480000 | 10.79960000 | 3.22350000  |
| C  | 9.02500000  | 5.50350000  | 7.70560000  |
| C  | 8.89730000  | 7.73470000  | 6.48940000  |
| H  | 7.97120000  | 7.66960000  | 6.42960000  |
| C  | 9.62930000  | 6.74330000  | 7.13950000  |
| C  | 9.63780000  | 4.25070000  | 7.15990000  |
| O  | 14.05350000 | 11.89040000 | 5.59300000  |
| C  | 9.55480000  | 8.81250000  | 5.93560000  |
| H  | 9.05380000  | 9.45500000  | 5.48740000  |
| C  | 10.99360000 | 10.79960000 | 2.43070000  |
| C  | 11.57540000 | 8.05220000  | 6.63540000  |
| H  | 12.49680000 | 8.15490000  | 6.70450000  |
| C  | 14.64820000 | 10.79960000 | 5.71290000  |
| C  | 10.98820000 | 6.92910000  | 7.18930000  |
| H  | 11.52280000 | 6.29050000  | 7.60320000  |
| C  | 10.23670000 | 3.30900000  | 7.95520000  |
| H  | 10.24760000 | 3.41370000  | 8.87940000  |
| C  | 16.11240000 | 10.79960000 | 5.93800000  |
| H  | 16.54590000 | 11.25820000 | 5.21190000  |
| H  | 16.42970000 | 9.89460000  | 5.97650000  |
| H  | 16.31040000 | 11.24620000 | 6.76170000  |
| C  | 10.22010000 | 2.90290000  | 5.24390000  |
| H  | 10.19450000 | 2.76520000  | 4.32460000  |
| C  | 9.62270000  | 4.06280000  | 5.78630000  |
| H  | 9.22370000  | 4.69060000  | 5.22890000  |
| C  | 10.81910000 | 1.99580000  | 6.02450000  |
| H  | 11.22400000 | 1.24710000  | 5.65090000  |
| C  | 10.83100000 | 2.18370000  | 7.35970000  |
| H  | 11.24450000 | 1.55130000  | 7.90150000  |
| C  | 10.73730000 | 10.79960000 | 0.93310000  |
| H  | 10.47040000 | 11.67860000 | 0.65390000  |
| H  | 10.03970000 | 10.17300000 | 0.72770000  |
| H  | 11.54010000 | 10.54740000 | 0.47070000  |
| N  | 6.17800000  | 8.97880000  | 10.30020000 |
| C  | 8.03050000  | 5.50350000  | 8.60770000  |
| C  | 8.15820000  | 7.73470000  | 9.82380000  |



|    |             |             |             |
|----|-------------|-------------|-------------|
| H  | 9.08440000  | 7.66960000  | 9.88370000  |
| C  | 7.42620000  | 6.74330000  | 9.17380000  |
| C  | 7.41770000  | 4.25070000  | 9.15340000  |
| C  | 7.50070000  | 8.81250000  | 10.37770000 |
| H  | 8.00170000  | 9.45500000  | 10.82580000 |
| C  | 5.48020000  | 8.05220000  | 9.67780000  |
| H  | 4.55870000  | 8.15490000  | 9.60880000  |
| C  | 6.06730000  | 6.92910000  | 9.12400000  |
| H  | 5.53270000  | 6.29050000  | 8.71000000  |
| C  | 6.81880000  | 3.30900000  | 8.35810000  |
| H  | 6.80800000  | 3.41370000  | 7.43380000  |
| C  | 6.83540000  | 2.90290000  | 11.06940000 |
| H  | 6.86100000  | 2.76520000  | 11.98870000 |
| C  | 7.43280000  | 4.06280000  | 10.52690000 |
| H  | 7.83180000  | 4.69060000  | 11.08430000 |
| C  | 6.23640000  | 1.99580000  | 10.28880000 |
| H  | 5.83150000  | 1.24710000  | 10.66240000 |
| C  | 6.22460000  | 2.18370000  | 8.95350000  |
| H  | 5.81100000  | 1.55130000  | 8.41180000  |
| H  | 10.47040000 | 9.92070000  | 0.65390000  |
| H  | 10.03970000 | 11.42630000 | 0.72770000  |
| H  | 11.54010000 | 11.05190000 | 0.47070000  |
| O  | 14.05350000 | 9.70890000  | 5.59300000  |
| H  | 16.54590000 | 10.34110000 | 5.21190000  |
| H  | 16.42970000 | 11.70470000 | 5.97650000  |
| H  | 16.31040000 | 10.35310000 | 6.76170000  |
| Hg | 5.11810000  | 10.79960000 | 11.24920000 |
| O  | 4.90270000  | 10.79960000 | 13.48940000 |
| O  | 7.00070000  | 10.79960000 | 13.08980000 |
| O  | 3.00200000  | 11.89040000 | 10.72030000 |
| C  | 6.06200000  | 10.79960000 | 13.88260000 |
| C  | 2.40730000  | 10.79960000 | 10.60040000 |
| C  | 0.94310000  | 10.79960000 | 10.37520000 |
| H  | 0.50960000  | 11.25820000 | 11.10140000 |
| H  | 0.62580000  | 9.89460000  | 10.33680000 |
| H  | 0.74510000  | 11.24620000 | 9.55150000  |
| C  | 6.31820000  | 10.79970000 | 15.38010000 |
| H  | 6.58520000  | 11.67860000 | 15.65930000 |
| H  | 7.01580000  | 10.17300000 | 15.58560000 |
| H  | 5.51540000  | 10.54740000 | 15.84260000 |
| H  | 6.58520000  | 9.92070000  | 15.65930000 |

|   |             |             |             |
|---|-------------|-------------|-------------|
| H | 7.01580000  | 11.42630000 | 15.58560000 |
| H | 5.51540000  | 11.05190000 | 15.84260000 |
| O | 3.00200000  | 9.70890000  | 10.72030000 |
| H | 0.50960000  | 10.34110000 | 11.10140000 |
| H | 0.62580000  | 11.70470000 | 10.33680000 |
| H | 0.74510000  | 10.35310000 | 9.55150000  |
| N | 6.17800000  | 12.62050000 | 10.30020000 |
| C | 8.03050000  | 16.09580000 | 8.60770000  |
| C | 8.15820000  | 13.86460000 | 9.82380000  |
| H | 9.08440000  | 13.92970000 | 9.88370000  |
| C | 7.42620000  | 14.85600000 | 9.17380000  |
| C | 7.41770000  | 17.34860000 | 9.15340000  |
| C | 7.50070000  | 12.78680000 | 10.37770000 |
| H | 8.00170000  | 12.14430000 | 10.82580000 |
| C | 5.48020000  | 13.54710000 | 9.67780000  |
| H | 4.55870000  | 13.44440000 | 9.60880000  |
| C | 6.06730000  | 14.67020000 | 9.12400000  |
| H | 5.53270000  | 15.30880000 | 8.71000000  |
| C | 6.81880000  | 18.29030000 | 8.35810000  |
| H | 6.80800000  | 18.18560000 | 7.43380000  |
| C | 6.83540000  | 18.69640000 | 11.06940000 |
| H | 6.86100000  | 18.83410000 | 11.98870000 |
| C | 7.43280000  | 17.53650000 | 10.52690000 |
| H | 7.83180000  | 16.90870000 | 11.08430000 |
| C | 6.23640000  | 19.60350000 | 10.28880000 |
| H | 5.83150000  | 20.35220000 | 10.66240000 |
| C | 6.22460000  | 19.41560000 | 8.95350000  |
| H | 5.81100000  | 20.04800000 | 8.41180000  |
| N | 10.87750000 | 12.62050000 | 6.01310000  |
| C | 9.02500000  | 16.09580000 | 7.70560000  |
| C | 8.89730000  | 13.86460000 | 6.48940000  |
| H | 7.97120000  | 13.92970000 | 6.42960000  |
| C | 9.62930000  | 14.85600000 | 7.13950000  |
| C | 9.63780000  | 17.34860000 | 7.15990000  |
| C | 9.55480000  | 12.78680000 | 5.93560000  |
| H | 9.05380000  | 12.14430000 | 5.48740000  |
| C | 11.57540000 | 13.54710000 | 6.63540000  |
| H | 12.49680000 | 13.44440000 | 6.70450000  |
| C | 10.98820000 | 14.67020000 | 7.18930000  |
| H | 11.52280000 | 15.30880000 | 7.60320000  |
| C | 10.23670000 | 18.29030000 | 7.95520000  |

|   |             |             |            |
|---|-------------|-------------|------------|
| H | 10.24760000 | 18.18560000 | 8.87940000 |
| C | 10.22010000 | 18.69640000 | 5.24390000 |
| H | 10.19450000 | 18.83410000 | 4.32460000 |
| C | 9.62270000  | 17.53650000 | 5.78630000 |
| H | 9.22370000  | 16.90870000 | 5.22890000 |
| C | 10.81910000 | 19.60350000 | 6.02450000 |
| H | 11.22400000 | 20.35220000 | 5.65090000 |
| C | 10.83100000 | 19.41560000 | 7.35970000 |
| H | 11.24450000 | 20.04800000 | 7.90150000 |

## 7. References

- [1] Frisch MJ, Trucks GW, Schlegel HB, Scuseria GE, Robb MA, Cheeseman JR, et al. Gaussian, Inc. Wallingford CT, 2009.
- [2] Becke AD. Density-functional thermochemistry. III. The role of exact exchange. J. Chem. Phys. 1993;98:5648-5652. <https://doi.org/10.1063/1.464913>.
- [3] Adamo C, Jacquemin D. The calculations of excited-state properties with time-dependent density functional theory. Chem. Soc. Rev. 2013;42:845-856. <https://doi.org/10.1039/C2CS35394F>.
